# Supplementary material for: Role of community health workers in improving cost efficiency in an active case finding tuberculosis programme: an operational research study from rural Bihar, India
Source: PubMed Central journal article supplement (PMC7536783; doi:10.1136/bmjopen-2019-036625), 2020-10-01

# BMJ Open

BMJ Open is committed to open peer review. As part of this commitment we make the peer review history of every article we publish publicly available.

When an article is published we post the peer reviewers' comments and the authors' responses online. We also post the versions of the paper that were used during peer review. These are the versions that the peer review comments apply to.

The versions of the paper that follow are the versions that were submitted during the peer review process. They are not the versions of record or the final published versions. They should not be cited or distributed as the published version of this manuscript.

BMJ Open is an open access journal and the full, final, typeset and author-corrected version of record of the manuscript is available on our site with no access controls, subscription charges or pay-per-view fees (<http://bmjopen.bmj.com>).

If you have any questions on BMJ Open's open peer review process please email [info.bmjopen@bmj.com](mailto:info.bmjopen@bmj.com)

# BMJ Open

## Leveraging community health workers for active case finding in rural India: outcomes and costs of a novel TB initiative

|                               |                                                                                                                                                                                                                                                                                                                    |
|-------------------------------|--------------------------------------------------------------------------------------------------------------------------------------------------------------------------------------------------------------------------------------------------------------------------------------------------------------------|
| Journal:                      | <i>BMJ Open</i>                                                                                                                                                                                                                                                                                                    |
| Manuscript ID                 | bmjopen-2019-036625                                                                                                                                                                                                                                                                                                |
| Article Type:                 | Original research                                                                                                                                                                                                                                                                                                  |
| Date Submitted by the Author: | 22-Dec-2019                                                                                                                                                                                                                                                                                                        |
| Complete List of Authors:     | Garg, Tushar; Innovators In Health, Research<br>Bhardwaj, Manish; Innovators In Health, Operations<br>Deo, Sarang; Indian School of Business, Operations Management                                                                                                                                                |
| Keywords:                     | Public health < INFECTIOUS DISEASES, Tuberculosis < INFECTIOUS DISEASES, PUBLIC HEALTH, Health economics < HEALTH SERVICES ADMINISTRATION & MANAGEMENT, International health services < HEALTH SERVICES ADMINISTRATION & MANAGEMENT, Organisation of health services < HEALTH SERVICES ADMINISTRATION & MANAGEMENT |
|                               |                                                                                                                                                                                                                                                                                                                    |

SCHOLARONE™  
Manuscripts

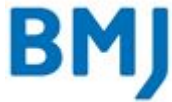

I, the Submitting Author has the right to grant and does grant on behalf of all authors of the Work (as defined in the below author licence), an exclusive licence and/or a non-exclusive licence for contributions from authors who are: i) UK Crown employees; ii) where BMJ has agreed a CC-BY licence shall apply, and/or iii) in accordance with the terms applicable for US Federal Government officers or employees acting as part of their official duties; on a worldwide, perpetual, irrevocable, royalty-free basis to BMJ Publishing Group Ltd ("BMJ") its licensees and where the relevant Journal is co-owned by BMJ to the co-owners of the Journal, to publish the Work in this journal and any other BMJ products and to exploit all rights, as set out in our [licence](#).

The Submitting Author accepts and understands that any supply made under these terms is made by BMJ to the Submitting Author unless you are acting as an employee on behalf of your employer or a postgraduate student of an affiliated institution which is paying any applicable article publishing charge ("APC") for Open Access articles. Where the Submitting Author wishes to make the Work available on an Open Access basis (and intends to pay the relevant APC), the terms of reuse of such Open Access shall be governed by a Creative Commons licence – details of these licences and which [Creative Commons](#) licence will apply to this Work are set out in our licence referred to above.

Other than as permitted in any relevant BMJ Author's Self Archiving Policies, I confirm this Work has not been accepted for publication elsewhere, is not being considered for publication elsewhere and does not duplicate material already published. I confirm all authors consent to publication of this Work and authorise the granting of this licence.

**TITLE**

Leveraging community health workers for active case finding in rural India: outcomes and costs of a novel TB initiative

**MANUSCRIPT TYPE**

Research article

**AUTHORS**

Tushar Garg<sup>1</sup>, Manish Bhardwaj<sup>1</sup>, Sarang Deo<sup>2</sup>

<sup>1</sup> Innovators In Health, Patna

<sup>2</sup> Indian School of Business, Hyderabad

**ADDRESS FOR CORRESPONDENCE**

Tushar Garg,

Innovators in Health, #176, Ground Floor, Road #2,

New Pataliputra Colony, Patna – 800013. Bihar. India.

Phone: +91 98286 09562

Email: [tgarg@innovatorsinhealth.org](mailto:tgarg@innovatorsinhealth.org)

**MANUSCRIPT DETAILS**

Abstract: 294 words

Manuscript: 3001 words

Tables: 4

Figures: 4

**KEYWORDS**

Accredited Social Health Activist (ASHA), Community Health Workers, Tuberculosis Active Case Finding, Cost Analysis

## ABSTRACT

### objectives

Cost-efficient active case finding (ACF) approaches are needed for their large-scale adoption in national TB programs (NTP). Our aim was to assess if CHWs' knowledge about health statuses of families can improve cost-efficiency of ACF program without adversely affecting delivery of other health services for which they are responsible.

### design

Quasi-experimental design

### interventions

We evaluated an ACF program in Samastipur district in Bihar, India between May 2017 and June 2018. CHWs (locally known as "ASHA") generated referrals of individuals at risk of TB and conducted symptom-based screening to identify presumptive TB patients. They also helped them undergo testing and provided treatment support for confirmed TB cases

### primary and secondary outcome measures

We compared the notification rate from the intervention region with that from a control region in the same district with similar characteristics. We analyzed operational data to calculate the cost per TB case diagnosed. We used routine programmatic data from the public health system to estimate the impact on other services provided by CHWs.

### findings

CHWs identified 9884 presumptive TB patients. Of these, 5852 patients were tested for TB and 1224 were confirmed as TB cases. Annual public case notification rate increased sharply in the intervention area from 45.8 to 105.8 per 100,000 population whereas it decreased from 50.7 to 45.3 in the control region. There was no practically or statistically significant impact on other output indicators of the CHWs, such as institutional deliveries (-0.04%). The overall cost of the intervention was about USD135.4 per diagnosed case. The main cost drivers were human resources, and commodities (drugs and diagnostics), which contributed 37.4% and 32.5% of the cost, respectively.

### conclusions

ACF programs that utilize existing CHWs in the health system are feasible, cost-efficient and do not adversely affect other healthcare services delivered by CHWs.

### STRENGTHS AND LIMITATIONS OF THIS STUDY

1. A pragmatic ACF implementation which utilized existing CHWs in the health system.
2. Used a comparable control region to obtain the incremental effect of the intervention.
3. Purposively selection of areas, hence, not a randomized control trial.
4. Patient costs incurred or averted and the NTP costs not included.
5. Small scale of the study and geographical location limit generalizability

For peer review only

## INTRODUCTION

The World Health Organization (WHO) estimates about 10 million people falling ill with TB and nearly 1.5 million dying of it in 2018.[1] Despite continuous increase in case notifications in recent years, the 2018 estimates predict a gap of as much as 30% between incident and notified cases globally. Progress toward WHO's target of 90% reduction in TB incidence rate by 2035 is severely limited by existing passive case-finding (PCF) approaches that wait for patients to seek care at a health facility.[2–4] As a result, these approaches fail to address significant barriers in accessing care such as poor geographical and financial access, stigma, and poor awareness.[5]

Active case-finding (ACF) can address these challenges by finding previously undetected cases, initiating them on treatment promptly and thereby decreasing TB incidence in the long run.[4,6–8] In contrast with passive approaches, ACF is a health system initiated screening process that uses context-specific diagnostic algorithms and accommodates various implementation strategies including mass radiography, contact investigation, and house-to-house surveys.[9–11] Although modelling studies have shown ACF strategies to be cost-effective, cost per diagnosed case of such programs can be very high thereby limiting their large-scale adoption.[12–15] As a result, there is limited empirical evidence from high-burden and resource-constrained settings to inform key operational decisions regarding ACF programs: who will conduct ACF activities, how will they be integrated within the health system, and how will these additional activities impact other health services.[16].

In this study, we address these questions with evidence from a novel intervention in rural India that leveraged existing Community Health Workers (CHWs) in the public health system for ACF activities. In particular, our aim is to assess if CHWs' knowledge about health statuses of families can improve cost-efficiency of ACF program without adversely affecting delivery of other health services for which they are responsible.

## METHODS

### study design

Our intervention was implemented from May 15<sup>th</sup>, 2017 with the approval of the state and district health administration as an extension of routine services provided as part of the Revised National TB Control Program (RNTCP). We used a quasi-experimental design to evaluate the impact of the intervention over a period between July 1<sup>st</sup>, 2017 and June 30<sup>th</sup>,

2018. We used aggregate intervention and programmatic data for our analysis and hence did not require ethics approval for the study.

### study setting

Our study was conducted in the Samastipur district of the east Indian state of Bihar. In 2011, it had a population of about 42.6 million, of which 96.5% lived in rural areas. The literacy rate was 50.3% and the sex ratio was 911.[17] Main source of income in more than 71.3% households was casual labor and the highest individual income was less than INR5000 (USD71) in 69.1% households.[18] Total fertility rate in the district was 3.8 and infant mortality rate was 53 deaths per 1000 live births.[19] More than 70% births occurred at a healthcare institution.[20] In 2017, annual TB case notification rate for the district was 55 per 100,000 population with a pre-treatment loss to follow-up (PTLFU) rate of 25%. In 2016, successful treatment outcome was reported for 72% of the microbiologically confirmed (Bac+) new TB cases (44% of all cases).[21]

The intervention region (IR) consisted of three blocks—Ujjarapur, Bibhutipur, and Sarairanjan—with a total population of 1,021,483.[Figure 1]. We chose four blocks—Kalyanpur, Warisnagar, Pusa, and Singhia—as the control region (CR) with a population of 981,924.[22] These were geographically separated from the IR to minimize spill-over effects of the intervention.

IR and CR were similar along relevant sociodemographic variables such as proportion of population belonging to scheduled castes (18.2% vs. 20.8%).[18][Table 1] Further, the structure of the public health systems in IR and CR was comparable on relevant dimensions. Each block in IR as well as CR coincided with a Tuberculosis Unit (TU) under the Revised National TB Control Program (RNTCP), which was managed by a Senior Treatment Supervisor (STS). IR and CR included four designated microscopy centers (DMCs) each, where sputum microscopy was provided. Finally, the annual TB case notification rate was comparable across IR and CR (52 vs. 53.1 per 100,000 population in 2016).[23]

Table 1

The demographic characteristics of the intervention and control region in the active case-finding project

| Characteristics | Intervention region | Control region |
|-----------------|---------------------|----------------|
|-----------------|---------------------|----------------|



|                                                                                      |         |        |
|--------------------------------------------------------------------------------------|---------|--------|
| Blocks                                                                               | 3       | 4      |
| Area (sq. km.)                                                                       | 582     | 623    |
| Population                                                                           | 1021483 | 981924 |
| Sex ratio                                                                            | 918     | 919    |
| Proportion of scheduled castes population                                            | 18.2%   | 20.8%  |
| Literacy rate                                                                        | 63.5%   | 59.8%  |
| Households with monthly income of highest earning household member less than INR5000 | 69.8%   | 70.6%  |

---

### intervention

We implemented an ACF intervention in collaboration with the RNTCP and the National Health Mission (NHM) with project funding from Stop TB Partnership's TB REACH. Under this intervention, we engaged with community health workers (CHWs), locally known as Accredited Social Health Activists (ASHAs), who work for the NHM. Their main role is community mobilization and facilitating last-mile delivery of health services across multiple programs though their focus is reproductive, maternal and child health. We trained these CHWs to identify patients with TB symptoms during their routine work and refer them to a field coordinator (FC). FCs further screened these patients using a symptom-based tool after obtaining their verbal consent.[9] Presumptive TB patients identified through screening were accompanied by ASHAs to the nearest PHC for diagnostic testing and physician consultation. All presumptive TB patients underwent sputum microscopy and chest X-ray (CXR). GeneXpert testing, if indicated by the diagnostic protocol, was conducted at the laboratory operated using project funding. Upon confirmation of TB diagnosis, ASHA obtained drugs from the STS and initiated treatment at patient's residence. For each confirmed case of TB, the project paid INR200 (USD3) to ASHA for referral, and INR300 (USD4.5) to ASHA for assisting in diagnosis and treatment initiation. ASHAs counselled patients on the importance of adherence and treatment completion and monitored them for adverse effects through regular follow-up household visits. They received INR400 (USD6) after their first follow-up visit and INR600 (USD9) upon successful completion of treatment.[Figure 2] In addition to these patient-focused activities, we also organized community meetings periodically to improve awareness of TB and available services under the project.

1  
2  
3 The project team was led by a program manager, who supervised three project managers  
4 responsible for operations, community engagement and monitoring and evaluation. Project  
5 manager for operations managed a team of block coordinators (BCs), one for each block in  
6 the intervention region, who managed a team of 6-7 field coordinators (FCs). Each FC  
7 covered a population of around 45,000, was responsible for training and supervision of 40-  
8 50 ASHAs and also helped with patient monitoring and community mobilization. In addition,  
9 the team included three data entry operators (DEO), data coordinator (DC), lab technician  
10 and a sputum carrier.[Figure 3]  
11  
12  
13  
14  
15  
16

## 17 data

18  
19 **Patient data.** We recorded individual patient information related to referral, screening,  
20 diagnosis, and treatment follow-up in paper forms. These were linked by a unique patient  
21 identifier and maintained in separate patient folders along with copies of patient's diagnostic  
22 records. Each FC maintained folders for patients in their respective catchment areas, which  
23 were audited weekly by the BC. Trained DEOs entered data from completed forms in a  
24 patient database designed in Microsoft Excel 2016. Two DEOs checked at least one-fifth of  
25 records entered in the database for completeness and errors introduced during data entry. In  
26 addition, the DC also conducted monthly audits of the patient database.  
27  
28  
29  
30  
31  
32

33  
34 **Cost data.** Each expense was first recorded on a paper-based voucher. A project manager  
35 verified each voucher, assigned it to one of the budget categories—staffing, activities (e.g.,  
36 training programs), health commodities and services (GeneXpert, CXR), and administrative  
37 overheads—and entered the information in a computer-based accounting software, Tally  
38 11®. The program manager reconciled monthly expenses against project budget.  
39  
40  
41  
42

43  
44 **Program data.** We obtained data on quarterly TB case notifications for each block from the  
45 district program office. We also extracted monthly data on three maternal and child health  
46 indicators representing ASHA's key activities from NHM Health Statistics Information  
47 Portal.[24] These included number of pregnant women registered for antenatal care (ANC),  
48 number of institutional deliveries, and number of immunization sessions where ASHA was  
49 present.  
50  
51  
52  
53  
54  
55  
56  
57  
58  
59  
60

### **analysis**

We calculated the quarterly flow of patients at each stage of the care pathway: referrals eligible for screening, patients screened, presumptive TB patients identified, patients tested, patients with confirmed TB diagnosis, and confirmed TB cases initiated on treatment. We defined the pre-diagnostic loss to follow-up as the proportion of presumptive TB patients who were not tested, and the pre-treatment loss to follow-up as the proportion of patients diagnosed with TB who were not initiated on treatment. We used the number of notified TB cases to calculate annual case notification rates per 100,000 population for IR and CR.

We calculated the quarterly averages for indicators on ASHAs' performance and mapped them to baseline period (Q3 of 2016 to Q2 of 2017) and study period (Q3 of 2017 to Q2 of 2018).

To calculate the intervention cost, we included all components of operational expenses (i.e., excluding capital expenditure) that were incurred over and above routine programmatic activities under RNTCP. We divided these costs between case-finding and treatment categories based either on actuals or on the amount of time spent by the staff on the different activities estimated through semi-structured interviews.[Supplementary file 1]

We divided FCs' workday into three components: travel, case-finding activities, and treatment support activities. We estimated the time spent on the latter two based on actual time taken for each activity per patient and average patient load per FC. We calculated travel time based on the average monthly travel reimbursement amount and allocated to it between case-finding and treatment support activities in proportion to their time spent on each of these. Similar analysis was repeated for BCs and project managers with some salient differences. We did not consider travel expenses for BCs and project managers as the amount of time spent by them on travel was minimal. The time spent by these staff members in supervision was allocated to case-finding and treatment support activities in proportion of the time allocated by their team members on these two categories. Finally, the data management's time was divided into case-finding and treatment support categories in proportion to the total time spent by FCs, BCs, and project managers.[Supplementary file 2]

### **patient and public involvement**

We neither involved patients in study design nor in the interpretation of findings.

## FINDINGS

From July 2017 to June 2018, the project received 12393 referrals eligible for screening. Of these, 11222 patients were screened for symptoms of TB, 9884 patients with symptoms of TB were identified. Of these, 5852 patients were tested for TB whereas the remaining 40.7% were classified as pre-diagnostic loss to follow up. Of those tested, 1224 patients were diagnosed with TB with 51.2% of those being confirmed with a microbiological test. Of the diagnosed patients, 1198 patients were initiated on TB treatment yielding a pre-treatment loss to follow-up of only 2.1%. [Figure 4]

Notification rate in IR increased from 45.8 at baseline to 105.8 during study period per 100000 population but decreased from 50.7 to 45.3 in CR. Similarly, the annual notification rate per 100,000 population based on microbiological confirmation increased from 20.4 to 40.2 in IR but decreased from 29.3 to 22.8 in CR. [Table 2]

Table 2

TB case notification rates per 100,000 population in the public sector in the intervention and control region of the active case-finding project

| Year | Quarter | IR   |           | CR   |           |
|------|---------|------|-----------|------|-----------|
|      |         | Bac+ | All cases | Bac+ | All cases |
| 2016 | Q3      | 5.8  | 11.8      | 7.5  | 13.9      |
|      | Q4      | 4.3  | 9.8       | 5.7  | 11.7      |
|      | Q1      | 5.4  | 11.4      | 7.6  | 12.4      |
| 2017 | Q2      | 4.9  | 12.8      | 8.5  | 12.7      |
|      | Q3      | 7.2  | 22.3      | 6.1  | 10.2      |
|      | Q4      | 9.5  | 26        | 5.4  | 9.5       |
| 2018 | Q1      | 9.6  | 27.7      | 6    | 12.6      |
|      | Q2      | 13.9 | 29.8      | 5.3  | 13        |

IR: Intervention region

CR: Control region

Bac+: Microbiologically-confirmed TB cases

1  
2  
3 The overall average cost per diagnosed patient over the duration of the project was  
4 USD135.4, varying from a minimum of USD114.1 in Q3 2017 to a maximum of USD155.3 in  
5 Q4 2017. The main contributors of the cost were human resources (37.4%) and medical  
6 commodities (32.5%). Project activities and administrative overhead contributed to 20.1%  
7 and 10% of the cost, respectively.[Table 3]  
8  
9  
10  
11  
12  
13  
14  
15  
16  
17  
18  
19  
20  
21  
22  
23  
24  
25  
26  
27  
28  
29  
30  
31  
32  
33  
34  
35  
36  
37  
38  
39  
40  
41  
42  
43  
44  
45  
46  
47  
48  
49  
50  
51  
52  
53  
54  
55  
56  
57  
58  
59  
60

For peer review only

Table 3

Costs incurred in the active case-finding program from Q3 of 2017 to Q2 of 2018.

| Categories                          | 2017 Q3       | 2017 Q4       | 2018 Q1       | 2018 Q2       | Total           | Proportion |
|-------------------------------------|---------------|---------------|---------------|---------------|-----------------|------------|
| Activities                          | INR 4,36,337  | INR 5,04,376  | INR 6,23,593  | INR 6,72,826  | INR 22,37,132   | 20.1%      |
| Administrative overheads            | INR 3,34,235  | INR 2,77,192  | INR 2,53,173  | INR 2,42,278  | INR 11,06,878   | 10.0%      |
| Human resources                     | INR 10,53,515 | INR 11,67,181 | INR 9,34,772  | INR 9,96,832  | INR 41,52,300   | 37.4%      |
| Commodities (drugs and diagnostics) | INR 3,46,683  | INR 11,83,689 | INR 13,05,790 | INR 7,70,858  | INR 36,07,020   | 32.5%      |
| Grand Total                         | INR 21,70,770 | INR 31,32,438 | INR 31,17,328 | INR 26,82,794 | INR 1,11,03,330 |            |
| TB cases diagnosed                  | 284           | 301           | 321           | 318           | 1224            |            |
| Cost per TB diagnosed (INR)         | INR 7,644     | INR 10,407    | INR 9,711     | INR 8,436     | INR 9,071       |            |
| Cost per TB diagnosed (USD)         | USD 114.1     | USD 155.3     | USD 144.9     | USD 125.9     | USD 135.4       |            |

Exchange rate: 1 USD =67 INR

The number of pregnant women registered for ANC increased by 6.1% and 3.8% in IR and CR respectively. The number of institutional deliveries increased by 2.6% in IR as well as CR. Finally, the number of immunization sessions where an ASHA was present increased in IR by 0.2% but decreased by 2.8% in CR.[Table 4]

Table 4

ASHA's performance on reproductive, maternal, and child health program indicators in the intervention and control region in the active case-finding program

| Indicator                                                |    | Baseline | Study period | Change |
|----------------------------------------------------------|----|----------|--------------|--------|
| Number of pregnant women registered for ANC              | IR | 5911     | 6270         | 6.1%   |
|                                                          | CR | 6098     | 6327         | 3.8%   |
| Number of institutional deliveries conducted             | IR | 3962     | 4065         | 2.6%   |
|                                                          | CR | 3560     | 3654         | 2.6%   |
| Number of immunisation sessions where ASHAs were present | IR | 2550     | 2555         | 0.2%   |
|                                                          | CR | 2716     | 2639         | -2.8%  |

All numbers are quarterly averages

Baseline period: Q3 of 2016 to Q2 of 2017

Study period: Q3 of 2017 to Q2 of 2018

IR: Intervention region

CR: Control region

ASHA: Accredited Social Health Activist

ANC: Antenatal checkup

## DISCUSSION

ACF has been widely recommended for early identification and treatment of patients and several modelling studies have shown it to be cost-effective [8,14,16]. However, large-scale adoption of health interventions in resource-limited settings often requires cost-efficiency in addition to cost-effectiveness. Unfortunately, there is limited and mixed evidence on cost-efficient strategies in high prevalence, resource-limited settings [16,25]. In this paper, we report on one such intervention that leveraged existing CHWs in the health system and their knowledge about community health status to drive cost-efficiency. The intervention resulted in a significant increase in notification rate at a cost of USD135 per case diagnosed. In addition, involvement of CHW in TB services did not adversely impact their existing tasks.

1  
2  
3  
4  
5 It has been suggested that leveraging existing CHWs to integrate TB screening services with  
6 other community health programs like child immunization can be effective.[26] However, our  
7 study is one of the first to demonstrate the practical feasibility of this approach. CHWs have  
8 extensive knowledge of the health system and are also trusted members of their  
9 communities. Consequently, they can leverage their unique position by acting as patient  
10 navigators and ensuring that they complete their pathways to treatment completion.[27–29]

11  
12  
13  
14  
15  
16 The unit cost of our intervention was substantially lower than that of other ACF interventions  
17 in the recent past. In Cambodia, ACF strategies using CHWs report a cost ranging from  
18 USD249 for door-to-door screening to USD316 for symptomatic.[15] A household contact  
19 investigation strategy in urban Uganda reported a cost of USD444 per additional case  
20 diagnosed.[26] One of the main drivers for the significant cost-efficiency of our intervention is  
21 that it, unlike door-to-door surveys or mass screening, relies on CHWs' experience and  
22 understanding of the community to find people at risk of TB. This approach is particularly  
23 useful and relevant in settings where TB incidence is evenly spread in the general  
24 population and it may not be possible to target specific high-risk population segments as  
25 recommended by WHO guidelines.[9] In particular, CHWs use their own social network to  
26 filter referrals from the larger population and enrich the stream of presumptive cases  
27 compared to what would have been possible with door-to-door screening. Lower loss to  
28 follow-up, mentioned earlier, also lowers the cost per case diagnosed and initiated on  
29 treatment.[30] Another Indian intervention that used CHWs to conduct door-to-door  
30 screening in a tribal population reported a cost of USD31 per patient excluding drugs and  
31 diagnostics. Similar components in our intervention costed USD91 per patient. The main  
32 driver for lower cost in that intervention was high incidence rate in the community (more than  
33 10 times the national estimate) and a smaller catchment area (approximately 1/9<sup>th</sup> of our  
34 study population) which resulted in significantly lower staffing and administrative cost.[31,32]

35  
36  
37  
38  
39  
40  
41  
42  
43  
44  
45  
46  
47 In a constrained health system, there are perennial concerns about overburdening CHWs  
48 with new tasks thereby resulting in poor program outcomes on the existing tasks.[33–35] In  
49 this context, it is encouraging that involvement of CHWs in TB ACF activities did not  
50 adversely affect their performance on tasks related to maternal and child health. Our results  
51 agree with evidence from Tanzania regarding the ability of CHWs to handle multiple roles in  
52 HIV program as well as maternal and child health program. In particular, that study did not  
53  
54  
55  
56  
57  
58  
59  
60



1  
2  
3 find significant difference between trajectory of monthly HIV visits by CHWs after they were  
4 assigned additional tasks related to maternal and child health.[34]  
5  
6  
7

8 Although the intervention produced encouraging results, its transition to a fully integrated  
9 component of the mainstream public health system is non-trivial and past evidence of such  
10 integration, both in India and elsewhere, is mixed.[36,37] Successful transition will require  
11 seamless interface between CHWs and senior RNCTP staff such as the STS. During the  
12 intervention, the field team enabled this link through supportive supervision of CHWs, which  
13 is known to be a major enabler for successful extension of CHWs' role to generate favorable  
14 outcomes.[38,39] Going forward, it would be crucial to develop a cadre of supervisors within  
15 the program who will fulfill this function. In the absence of this supervisory capacity, each  
16 STS will have to manage 150-200 CHWs, which may not be effective. Our analysis provides  
17 a framework of calculating the cost of building this supervisory capacity, which can be  
18 incorporated in the states' annual budgeting cycles through their project implementation  
19 plan.  
20  
21  
22  
23  
24  
25  
26  
27

28 The main strengths of our study emanate from the fact that our intervention was a pragmatic  
29 ACF implementation that utilized existing CHWs in the health system. The study was  
30 conducted in a routine programmatic site, which simulated a typical low-resource setting  
31 environment with a regular health system. We also utilized routine programmatic data on  
32 case notifications for impact evaluation and also on other health outputs to capture any  
33 externality on provision of other health services. We used a comparable control region within  
34 the same district to obtain the incremental effect of the intervention over and above other  
35 secular changes in program implementation. Finally, we had access to granular activity-level  
36 costing data, which limited (but did not eliminate) the need to allocate indirect costs.  
37  
38  
39  
40  
41  
42  
43

44 However, our study also has some limitations. First, it was not designed as a randomized  
45 control trial. We purposively chose blocks in the IR based on the catchment area of the prior  
46 work done by the community-based organization that led this intervention. The CR, though  
47 similar to the IR in many important and relevant aspects, was also purposively chosen. As a  
48 result, we cannot rigorously claim that the impact calculated from our study is caused by the  
49 intervention and is representative at the state or national level. Second, we focused only on  
50 the incremental health system cost incurred by the intervention and did not include patient  
51 costs incurred or averted as well as costs incurred by the RNTCP to coordinate with our  
52 intervention. Finally, limited duration of our intervention did not allow us to capture longer-  
53  
54  
55  
56  
57  
58  
59  
60

1  
2  
3 term health outcomes such as successful treatment completion and reduced incidence,  
4 which have been documented in previous studies involving CHWs.[40–42] Careful  
5 accounting of these costs and benefits would be needed to conduct a comprehensive cost-  
6 effectiveness analysis of a national scale-up of our intervention from a societal perspective.  
7  
8  
9

## 10 **CONCLUSION**

11 Existing CHWs in the health system can be leveraged to detect additional TB cases through  
12 active case finding in a cost-efficient manner. Appropriate and supportive supervision can  
13 ensure that the intervention does not adversely affect the delivery of other healthcare  
14 services in their portfolio. National scale-up of such intervention should budget for additional  
15 supervisory staff to ensure integration of CHWs' work with the senior staff in the national TB  
16 program.  
17  
18  
19  
20  
21  
22  
23  
24  
25  
26  
27  
28  
29  
30  
31  
32  
33  
34  
35  
36  
37  
38  
39  
40  
41  
42  
43  
44  
45  
46  
47  
48  
49  
50  
51  
52  
53  
54  
55  
56  
57  
58  
59  
60

## **ADDITIONAL INFORMATION**

### **acknowledgement**

We thank the RNTCP, Government of Bihar, State TB Officer Dr. (Major) K. N. Sahai, Communicable Disease Officer Dr. Sree Ram Prasad, and Dr. Miranda Brouwer for their support. We also acknowledge the efforts of the ASHAs and the project team at Innovators In Health. This work was presented at the 50th Union World Conference on Lung Health 2019 and we thank the audience for their comments.

### **competing interest**

None declared

### **funding**

This project was supported by the Stop TB Partnership's TB REACH initiative and was funded by the Government of Canada and the Bill & Melinda Gates Foundation. Manish Bhardwaj is supported by a Grand Challenges Explorations grant number OPP1190735 from the Bill & Melinda Gates Foundation.

### **ethics approval**

A separate ethics approval was not obtained as we used aggregate intervention and programmatic data for our analysis. The project was approved by the appropriate government officials.

### **author contribution**

Conceptualization of the intervention: TG, MB

Conceptualization of the analysis: TG, SD

Data collection: TG

Data analysis and interpretation: TG, SD

Writing — original draft: TG

Writing — review and edits: TG, SD, MB

### **data sharing**

The cost data used in the study is published in Supplementary File 1. The aggregate indicators used to evaluate program are available from the corresponding author on reasonable request.

## REFERENCES

- 1 World Health Organization. *Global tuberculosis report 2019*. World Health Organization 2019. <https://apps.who.int/iris/handle/10665/329368> (accessed 18 Oct 2019).
- 2 World Health Organization. *Implementing the end TB strategy: the essentials*. Geneva: : World Health Organization 2015. <https://apps.who.int/iris/handle/10665/206499>
- 3 Houben RMGJ, Menzies NA, Sumner T, *et al*. Feasibility of achieving the 2025 WHO global tuberculosis targets in South Africa, China, and India: a combined analysis of 11 mathematical models. *The Lancet Global Health* 2016;**4**:e806–15. doi:10/f9b2vh
- 4 Yuen CM, Amanullah F, Dharmadhikari A, *et al*. Turning off the tap: stopping tuberculosis transmission through active case-finding and prompt effective treatment. *The Lancet* 2015;**386**:2334–43. doi:10/f73mmd
- 5 Wells WA. Onions and prevalence surveys: how to analyze and quantify tuberculosis case-finding gaps. *The International Journal of Tuberculosis and Lung Disease* 2017;**21**:1101–13. doi:10.5588/ijtld.17.0271
- 6 Reid MJA, Arinaminpathy N, Bloom A, *et al*. Building a tuberculosis-free world: The Lancet Commission on tuberculosis. *The Lancet* 2019;**393**:1331–84. doi:10/gfxc87
- 7 Reid MJ, Shah NS. Approaches to tuberculosis screening and diagnosis in people with HIV in resource-limited settings. *The Lancet Infectious Diseases* 2009;**9**:173–84. doi:10/fhkc6t
- 8 Ho J, Fox GJ, Marais BJ. Passive case finding for tuberculosis is not enough. *International Journal of Mycobacteriology* 2016;**5**:374–8. doi:10/gcpgsf
- 9 World Health Organization. Systematic screening for active tuberculosis: principles and recommendations. 2013.
- 10 Golub JE, Mohan CI, Comstock GW, *et al*. Active case finding of tuberculosis: historical perspective and future prospects. *The International Journal of Tuberculosis and Lung Disease* 2005;**9**:1183–203.
- 11 Uplekar M, Creswell J, Ottmani S-E, *et al*. Programmatic approaches to screening for active tuberculosis [State of the art series. Active case finding/screening. Number 6 in the series]. *The International Journal of Tuberculosis and Lung Disease* 2013;**17**:1248–56. doi:10/f5hbxx
- 12 Saunders MJ, Tovar MA, Collier D, *et al*. Active and passive case-finding in tuberculosis-affected households in Peru: a 10-year prospective cohort study. *The Lancet Infectious Diseases* 2019;**19**:519–28. doi:10/gf6mj8
- 13 Kranzer K, Lawn SD, Meyer-Rath G, *et al*. Feasibility, Yield, and Cost of Active Tuberculosis Case Finding Linked to a Mobile HIV Service in Cape Town, South Africa: A Cross-sectional Study. *PLoS Medicine* 2012;**9**:e1001281. doi:10/gdxx8c
- 14 Azman AS, Golub JE, Dowdy DW. How much is tuberculosis screening worth? Estimating the value of active case finding for tuberculosis in South Africa, China, and India. *BMC Medicine* 2014;**9**. doi:10/gb33tt

- 1
  - 2
  - 3
  - 4
  - 5
  - 6
  - 7
  - 8
  - 9
  - 10
  - 11
  - 12
  - 13
  - 14
  - 15
  - 16
  - 17
  - 18
  - 19
  - 20
  - 21
  - 22
  - 23
  - 24
  - 25
  - 26
  - 27
  - 28
  - 29
  - 30
  - 31
  - 32
  - 33
  - 34
  - 35
  - 36
  - 37
  - 38
  - 39
  - 40
  - 41
  - 42
  - 43
  - 44
  - 45
  - 46
  - 47
  - 48
  - 49
  - 50
  - 51
  - 52
  - 53
  - 54
  - 55
  - 56
  - 57
  - 58
  - 59
  - 60
- 15 James R, Khim K, Boudarene L, *et al.* Tuberculosis active case finding in Cambodia: a pragmatic, cost-effectiveness comparison of three implementation models. *BMC Infect Dis* 2017;**17**:580. doi:10/gdxs8g
- 16 Dobler CC. Screening strategies for active tuberculosis: focus on cost-effectiveness. *ClinicoEconomics and Outcomes Research* 2016;**8**:335–47. doi:10/gdxtmw
- 17 Registrar General of India. Census of India 2011. Office of the Registrar General Census Commissioner, India 2011.
- 18 Socio-Economic Caste Census 2011. Ministry of Rural Development, Government of India <https://secc.gov.in/> (accessed 31 Aug 2019).
- 19 Annual Health Survey 2011-12, Bihar Factsheet. New Delhi: : Office of the Registrar General & Census Commissioner [http://www.censusindia.gov.in/vital\\_statistics/AHSBulletins/AHS\\_Factsheets\\_2011\\_12/Bihar\\_Factsheet\\_2011-12.pdf](http://www.censusindia.gov.in/vital_statistics/AHSBulletins/AHS_Factsheets_2011_12/Bihar_Factsheet_2011-12.pdf) (accessed 3 Feb 2019).
- 20 International Institute for Population Sciences. NFHS 4 Factsheet Samastipur. International Institute for Population Sciences [http://rchiips.org/nfhs/FCTS/BR/BR\\_FactSheet\\_221\\_Samastipur.pdf](http://rchiips.org/nfhs/FCTS/BR/BR_FactSheet_221_Samastipur.pdf) (accessed 3 Feb 2019).
- 21 Central TB Division. India TB Report 2018. New Delhi, India: : Directorate General of Health Services, Ministry of Health and Family Welfare, Government of India 2018. <https://tbcindia.gov.in/showfile.php?lid=3314> (accessed 18 Nov 2019).
- 22 Blok L, Creswell J, Stevens R, *et al.* A pragmatic approach to measuring, monitoring and evaluating interventions for improved tuberculosis case detection. *International Health* 2014;**6**:181–8. doi:10.1093/inthealth/ihu055
- 23 District TB Report, Samastipur. District TB Cell, Revised National TB Control Program 2017.
- 24 Ministry of Health & Family Welfare, Government of India. NHM Health Statistics Information Portal. NHM Health Statistics Information Portal. <https://nrhm-mis.nic.in/SitePages/Home.aspx> (accessed 4 Feb 2019).
- 25 Lung T, Marks GB, Nhung NV, *et al.* Household contact investigation for the detection of tuberculosis in Vietnam: economic evaluation of a cluster-randomised trial. *The Lancet Global Health* 2019;**7**:e376–84. doi:10/gf5tdz
- 26 Sekandi JN, Dobbin K, Oloya J, *et al.* Cost-effectiveness analysis of community active case finding and household contact investigation for tuberculosis case detection in urban Africa. *PLoS ONE* 2015;**10**:e0117009. doi:10.1371/journal.pone.0117009
- 27 Mishra A. 'Trust and teamwork matter': Community health workers' experiences in integrated service delivery in India. *Global Public Health* 2014;**9**:960–74. doi:10/gf6k98
- 28 Yellapa V, Devadasan N, Krumeich A, *et al.* How patients navigate the diagnostic ecosystem in a fragmented health system: a qualitative study from India. *Global Health Action* 2017;**10**:1350452. doi:10/gf2pcd

- 1  
2  
3 29 Subbaraman R, Nathavitharana RR, Mayer KH, *et al.* Constructing care cascades for  
4 active tuberculosis: A strategy for program monitoring and identifying gaps in quality of  
5 care. *PLOS Medicine* 2019;**16**:e1002754. doi:10/gf38sz  
6  
7 30 Subbaraman R, Nathavitharana RR, Satyanarayana S, *et al.* The Tuberculosis Cascade  
8 of Care in India's Public Sector: A Systematic Review and Meta-analysis. *PLOS*  
9 *Medicine* 2016;**13**:e1002149. doi:10/f9b29f  
10  
11 31 Vyas A, Creswell J, Codlin AJ, *et al.* Community-based active case-finding to reach the  
12 most vulnerable: tuberculosis in tribal areas of India. *The International Journal of*  
13 *Tuberculosis and Lung Disease* 2019;**23**:750–755. doi:10.5588/ijtld.18.0741  
14  
15 32 Sohn H, Vyas A, Puri L, *et al.* Costs and operation management of community outreach  
16 program for tuberculosis in tribal populations in India. *Public Health Action* 2019;**9**:58–  
17 62. doi:10/gf5zst  
18  
19 33 Shelley KD, Mpembeni R, Frumence G, *et al.* Integrating Community Health Worker  
20 Roles to Improve Facility Delivery Utilization in Tanzania: Evidence from an Interrupted  
21 Time Series Analysis. *Maternal and Child Health Journal* 2019;**23**:1327–38.  
22 doi:10/gf5xfh  
23  
24 34 Shelley KD, Frumence G, Mpembeni R, *et al.* Can volunteer community health workers  
25 manage multiple roles? An interrupted time-series analysis of combined HIV and  
26 maternal and child health promotion in Iringa, Tanzania. *Health Policy and Planning*  
27 2018;**33**:1096–106. doi:10/gf5xd7  
28  
29 35 Singh S, Dwivedi N, Dongre A, *et al.* Functioning and time utilisation by female multi-  
30 purpose health workers in South India: a time and motion study. *Human Resources for*  
31 *Health* 2018;**16**:64. doi:10/gf6mbt  
32  
33 36 Scott K, George AS, Ved RR. Taking stock of 10 years of published research on the  
34 ASHA programme: examining India's national community health worker programme from  
35 a health systems perspective. *Health Research Policy and Systems* 2019;**17**:29.  
36 doi:10/gf2t58  
37  
38 37 Sundaram N, James R, Sreynimol U, *et al.* A strong TB programme embedded in a  
39 developing primary healthcare system is a lose-lose situation: insights from patient and  
40 community perspectives in Cambodia. *Health Policy Plan* 2017;**32**:ii32–42.  
41 doi:10.1093/heapol/czx079  
42  
43 38 Scott K, Beckham SW, Gross M, *et al.* What do we know about community-based health  
44 worker programs? A systematic review of existing reviews on community health workers.  
45 *Human Resources for Health* 2018;**16**:39. doi:10.1186/s12960-018-0304-x  
46  
47 39 Adejumo AO, Azuogu B, Okorie O, *et al.* Community referral for presumptive TB in  
48 Nigeria: a comparison of four models of active case finding. *BMC Public Health*  
49 2016;**16**:177. doi:10.1186/s12889-016-2769-7  
50  
51 40 Datiko DG, Lindtjörn B. Health Extension Workers Improve Tuberculosis Case Detection  
52 and Treatment Success in Southern Ethiopia: A Community Randomized Trial. *PLOS*  
53 *One* 2009;**4**:e5443. doi:10/d9zb95  
54  
55  
56  
57  
58  
59  
60

- 1  
2  
3 41 Musa BM, Iliyasu Z, Yusuf SM, *et al.* Systematic review and metanalysis on community  
4 based interventions in tuberculosis care in developing countries. *Niger J Med*  
5 2014;**23**:103–17.  
6  
7 42 Alipanah N, Jarlsberg L, Miller C, *et al.* Adherence interventions and outcomes of  
8 tuberculosis treatment: A systematic review and meta-analysis of trials and  
9 observational studies. *PLOS Medicine* 2018;**15**:e1002595. doi:10/gdsx3v  
10  
11  
12  
13  
14  
15  
16  
17  
18  
19  
20  
21  
22  
23  
24  
25  
26  
27  
28  
29  
30  
31  
32  
33  
34  
35  
36  
37  
38  
39  
40  
41  
42  
43  
44  
45  
46  
47  
48  
49  
50  
51  
52  
53  
54  
55  
56  
57  
58  
59  
60

For peer review only

## LEGEND FOR FIGURES

### figure 1

Map indicating the blocks in intervention and control region in Samastipur district, Bihar.

### figure 2

The diagnostic protocol used in the active case-finding project.

Legend: T/T: Treatment; F/U: Follow-up; EPTB: Extrapulmonary TB; DSTB: Drug-sensitive TB; DRTB: Drug-resistant TB; PLHIV: People living with HIV; CXR(?): Irrespective of the CXR result

### figure 3

The organization chart in the active case-finding project

### figure 4

The patient care cascade from Q3 2017 to Q2 2018

\* All percentages are calculated as a proportion of the number of participants entering the previous step of the cascade



1  
2  
3  
4  
5  
6  
7  
8  
9  
10  
11  
12  
13  
14  
15  
16  
17  
18  
19  
20  
21  
22  
23  
24  
25  
26  
27  
28  
29  
30  
31  
32  
33  
34  
35  
36  
37  
38  
39  
40  
41

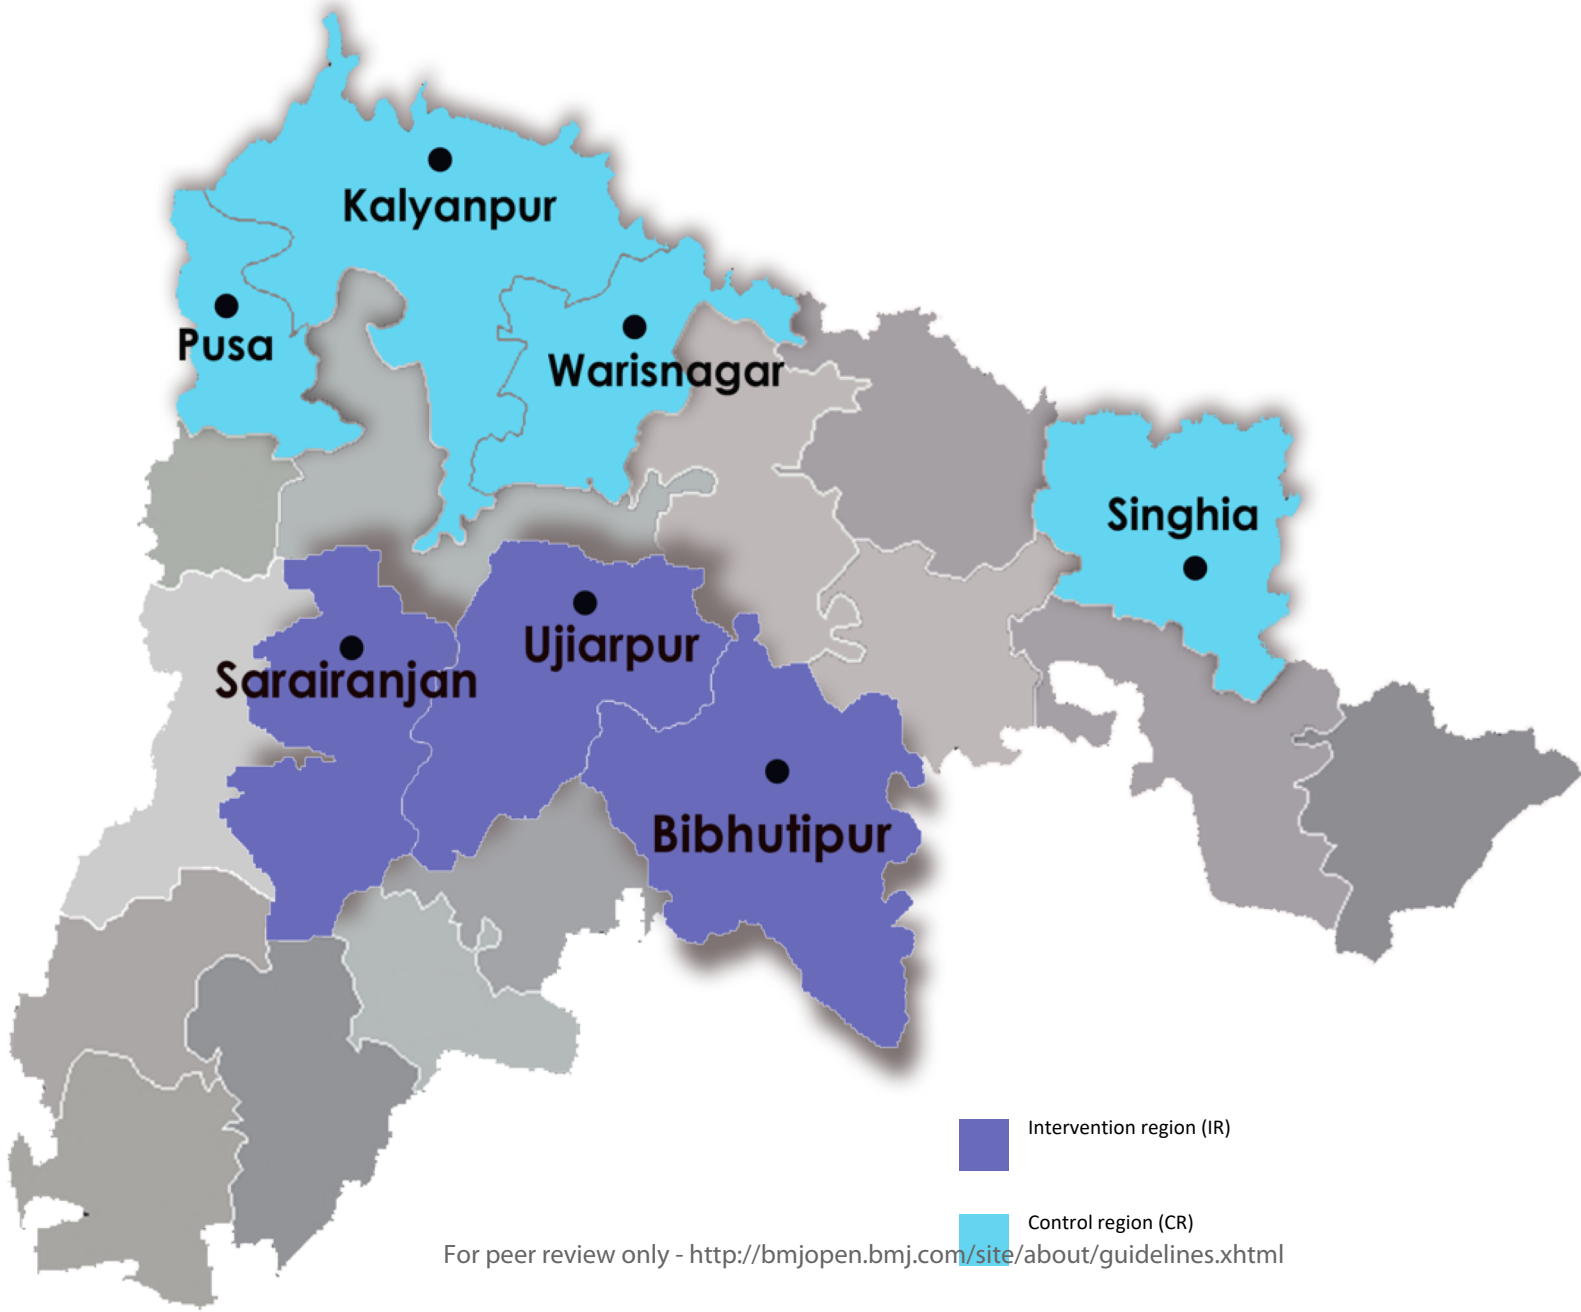

BMJ Open Referral

Symptom screening

- a. Cough ≥ 2 weeks
- b. Blood in sputum
- c. Chest pain
- d. Fever ≥ 2 weeks
- e. Night-sweats
- f. Significant weight loss
- g. Fatigue
- h. Swollen lymph nodes

Any symptom  
Presumptive TB case

No symptom

Sputum Microscopy (AFB) and CXR

AFB(+) and CXR(?)

AFB(-)

CXR(Abnormal)

CXR(Normal)

GeneXpert

GeneXpert(+)

GeneXpert(-)

Microbiologically  
diagnosed TB

Physician  
Consultation

Clinically  
diagnosed TB

Alternate diagnosis

- a. Presumptive DRTB Patients
  - i. Failed First Line TB T/T
  - ii. Contact of DRTB
  - iii. Bac+ on F/U
  - iv. Previously treated
  - v. PLHIV
- b. Presumptive EPTB Case
- c. Paediatric Cases

Upfront  
GeneXpert

High clinical suspicion

1  
2  
3  
4  
5  
6  
7  
8  
9  
10  
11  
12  
13  
14  
15  
16  
17  
18  
19  
20  
21  
22  
23  
24  
25  
26  
27  
28  
29  
30  
31  
32  
33  
34  
35  
36  
37  
38  
39  
40  
41

1  
2  
3  
4  
5  
6  
7  
8  
9  
10  
11  
12  
13  
14  
15  
16  
17  
18  
19  
20  
21  
22  
23  
24  
25  
26  
27  
28  
29  
30  
31  
32  
33  
34  
35  
36  
37  
38  
39  
40  
41

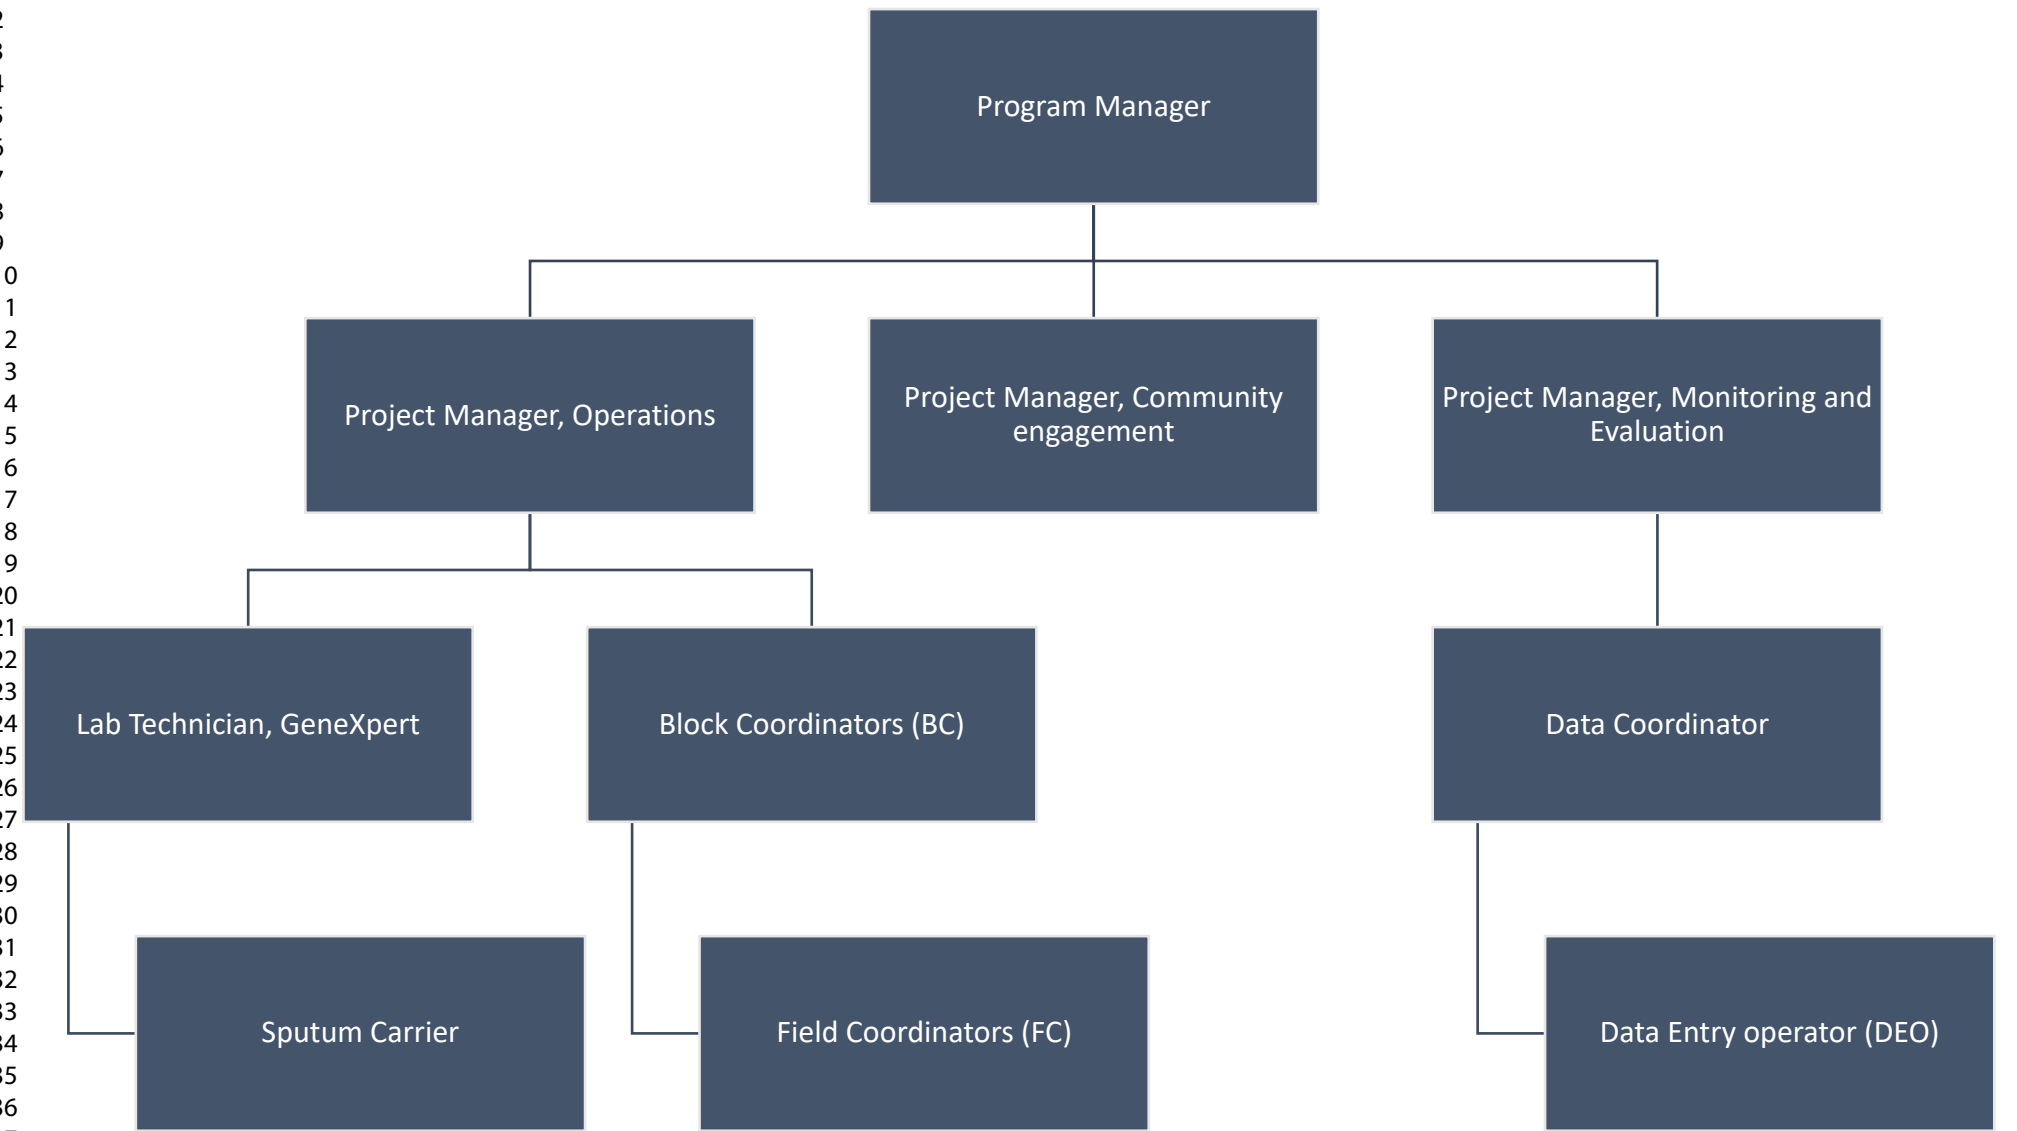

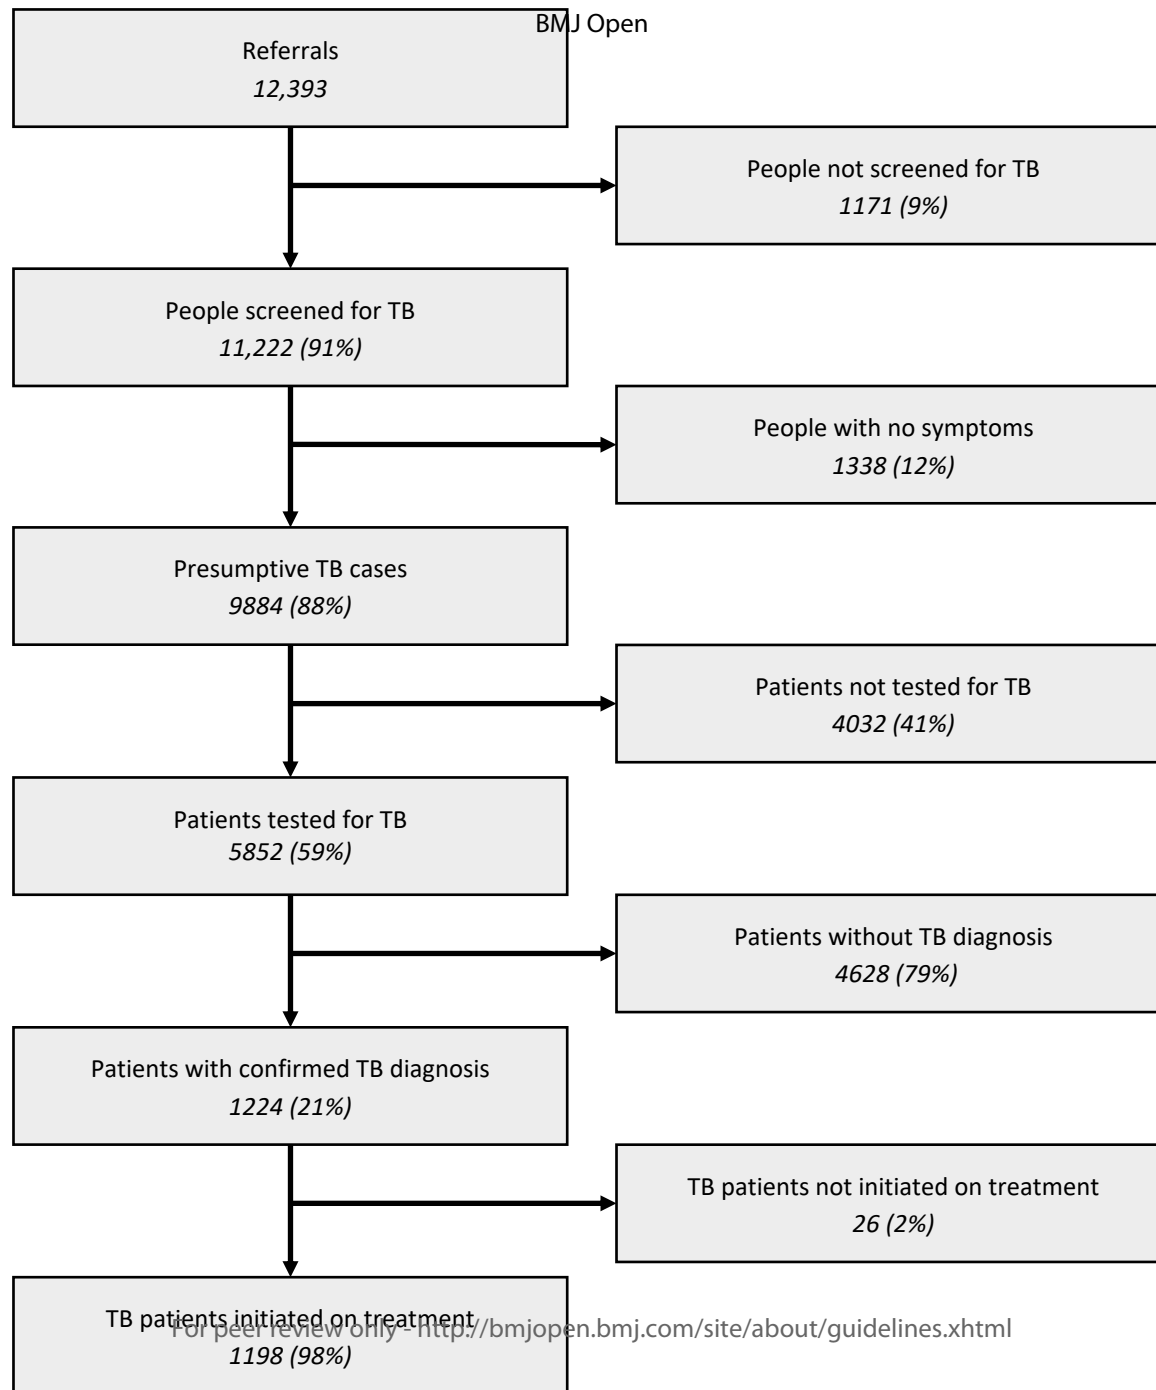

BMJ Open

Referrals  
12,393

People not screened for TB  
1171 (9%)

People screened for TB  
11,222 (91%)

People with no symptoms  
1338 (12%)

Presumptive TB cases  
9884 (88%)

Patients not tested for TB  
4032 (41%)

Patients tested for TB  
5852 (59%)

Patients without TB diagnosis  
4628 (79%)

Patients with confirmed TB diagnosis  
1224 (21%)

TB patients not initiated on treatment  
26 (2%)

TB patients initiated on treatment  
1198 (98%)

1  
2  
3  
4  
5  
6  
7  
8  
9  
10  
11  
12  
13  
14  
15  
16  
17  
18  
19  
20  
21  
22  
23  
24  
25  
26  
27  
28  
29  
30  
31  
32  
33  
34  
35  
36  
37  
38  
39  
40  
41

1  
2 Supplementary File 1: The cost breakdown of the active case-finding program from Q3 2017 to Q2 2018 with cost allocation between case-finding and treatment support activities

| #  | Category                        | Item                                        | 2017Q3     | 2017Q4     | 2018Q1     | 2018Q2     | Total       | Comment            | Cost allocation |           |       | Case-finding costs proportionate to the cost allocation |            |            |            |             |
|----|---------------------------------|---------------------------------------------|------------|------------|------------|------------|-------------|--------------------|-----------------|-----------|-------|---------------------------------------------------------|------------|------------|------------|-------------|
|    |                                 |                                             |            |            |            |            |             |                    | Case-finding    | Treatment | Blank | C2017Q3                                                 | C2017Q4    | C2018Q1    | C2018Q2    | Ctotal      |
| 4  | 1 Activities                    | Trainers, per-diem costs                    | ₹ 29,850   | ₹ 29,850   | ₹ 29,850   | ₹ 29,850   | ₹ 1,19,400  |                    | 100%            | 0%        |       | ₹ 29,850                                                | ₹ 29,850   | ₹ 29,850   | ₹ 29,850   | ₹ 1,19,400  |
| 5  | 2 Activities                    | Case-finding incentives                     | ₹ 1,42,000 | ₹ 1,50,500 | ₹ 1,60,500 | ₹ 1,59,000 | ₹ 6,12,000  | Unit cost INR500   | 100%            | 0%        |       | ₹ 1,42,000                                              | ₹ 1,50,500 | ₹ 1,60,500 | ₹ 1,59,000 | ₹ 6,12,000  |
| 6  | 3 Activities                    | Treatment completion incentives             | ₹ 2,65,050 | ₹ 2,82,150 | ₹ 2,98,300 | ₹ 2,92,600 | ₹ 11,38,100 | Unit cost INR1000  | 0%              | 100%      |       | ₹ -                                                     | ₹ -        | ₹ -        | ₹ -        | ₹ -         |
| 7  | 4 Activities                    | Field visits (fuel costs, management)       | ₹ 2,71,541 | ₹ 3,11,828 | ₹ 3,69,122 | ₹ 3,23,806 | ₹ 12,76,297 |                    | 66%             | 34%       |       | ₹ 1,80,029                                              | ₹ 2,06,739 | ₹ 2,44,724 | ₹ 2,14,680 | ₹ 8,46,171  |
| 8  | 5 Activities                    | Training and workshops                      | ₹ 65,395   | ₹ 52,488   | ₹ 58,690   | ₹ 2,69,343 | ₹ 4,45,916  |                    | 55%             | 45%       |       | ₹ 35,925                                                | ₹ 28,835   | ₹ 32,242   | ₹ 1,47,965 | ₹ 2,44,967  |
| 9  | 6 Activities                    | Transport allowance                         | ₹ 24,059   | ₹ 73,053   | ₹ 1,06,012 | ₹ 1,04,381 | ₹ 3,07,505  |                    | 100%            | 0%        |       | ₹ 24,059                                                | ₹ 73,053   | ₹ 1,06,012 | ₹ 1,04,381 | ₹ 3,07,505  |
| 10 | 7 Activities                    | Communication material                      | ₹ 24,474   | ₹ 15,400   | ₹ 50,265   | ₹ 16,950   | ₹ 1,07,089  |                    | 100%            | 0%        |       | ₹ 24,474                                                | ₹ 15,400   | ₹ 50,265   | ₹ 16,950   | ₹ 1,07,089  |
| 11 | 8 Administrative overheads      | Information technology (mobile data, voice) | ₹ 25,020   | ₹ 25,638   | ₹ 16,969   | ₹ 13,150   | ₹ 80,777    |                    | 66%             | 34%       |       | ₹ 16,588                                                | ₹ 16,998   | ₹ 11,250   | ₹ 8,718    | ₹ 53,554    |
| 12 | 9 Administrative overheads      | Car rental (per month)                      | ₹ 1,50,000 | ₹ 1,50,000 | ₹ 1,50,000 | ₹ 1,50,000 | ₹ 6,00,000  |                    | 81%             | 19%       |       | ₹ 1,21,835                                              | ₹ 1,21,835 | ₹ 1,21,835 | ₹ 1,21,835 | ₹ 4,87,339  |
| 13 | 10 Administrative overheads     | Rent                                        | ₹ 43,900   | ₹ 51,900   | ₹ 51,900   | ₹ 51,900   | ₹ 1,99,600  |                    | 81%             | 19%       |       | ₹ 35,657                                                | ₹ 42,155   | ₹ 42,155   | ₹ 42,155   | ₹ 1,62,121  |
| 14 | 11 Administrative overheads     | Electricity                                 | ₹ 4,085    | ₹ 8,055    | ₹ 7,740    | ₹ 7,654    | ₹ 27,534    |                    | 81%             | 19%       |       | ₹ 3,318                                                 | ₹ 6,543    | ₹ 6,287    | ₹ 6,217    | ₹ 22,364    |
| 15 | 12 Administrative overheads     | Supplies (stationery, workshops, etc.)      | ₹ 1,93,094 | ₹ 1,10,390 | ₹ 88,210   | ₹ 78,000   | ₹ 4,69,694  |                    | 81%             | 19%       |       | ₹ 1,56,837                                              | ₹ 89,662   | ₹ 71,647   | ₹ 63,354   | ₹ 3,81,500  |
| 16 | 13 Human resources              | Program manager                             | ₹ 2,10,000 | ₹ 2,10,000 | ₹ 2,10,000 | ₹ 2,10,000 | ₹ 8,40,000  |                    | 81%             | 19%       |       | ₹ 1,70,569                                              | ₹ 1,70,569 | ₹ 1,70,569 | ₹ 1,70,569 | ₹ 6,82,275  |
| 17 | 14 Human resources              | Project manager (community and training)    | ₹ 1,35,000 | ₹ 1,35,000 | ₹ 1,35,000 | ₹ 2,03,226 | ₹ 6,08,226  |                    | 81%             | 19%       |       | ₹ 1,09,651                                              | ₹ 1,09,651 | ₹ 1,09,651 | ₹ 1,65,067 | ₹ 4,94,020  |
| 18 | 15 Human resources              | Project manager (service delivery)          | ₹ 2,10,484 | ₹ 2,70,000 | ₹ 1,46,613 | ₹ 1,35,000 | ₹ 7,62,097  |                    | 81%             | 19%       |       | ₹ 1,70,962                                              | ₹ 2,19,303 | ₹ 1,19,084 | ₹ 1,09,651 | ₹ 6,18,999  |
| 19 | 16 Human resources              | GeneXpert technician                        | ₹ 56,903   | ₹ 1,02,000 | ₹ 1,02,000 | ₹ 1,02,000 | ₹ 3,62,903  |                    | 100%            | 0%        |       | ₹ 56,903                                                | ₹ 1,02,000 | ₹ 1,02,000 | ₹ 1,02,000 | ₹ 3,62,903  |
| 20 | 17 Human resources              | MIS operator                                | ₹ 49,484   | ₹ 90,250   | ₹ 1,01,000 | ₹ 1,16,250 | ₹ 3,56,984  |                    | 66%             | 34%       |       | ₹ 32,807                                                | ₹ 59,835   | ₹ 66,962   | ₹ 77,073   | ₹ 2,36,677  |
| 21 | 18 Human resources              | Consultants                                 | ₹ 1,66,833 | ₹ 1,65,000 | ₹ -        | ₹ -        | ₹ 3,31,833  |                    | 100%            | 0%        |       | ₹ 1,66,833                                              | ₹ 1,65,000 | ₹ -        | ₹ -        | ₹ 3,31,833  |
| 22 | 19 Human resources              | Block coordinators (BCs)                    | ₹ 1,92,000 | ₹ 1,92,000 | ₹ 1,92,000 | ₹ 1,92,000 | ₹ 7,68,000  |                    | 62%             | 38%       |       | ₹ 1,19,897                                              | ₹ 1,19,897 | ₹ 1,19,897 | ₹ 1,19,897 | ₹ 4,79,588  |
| 23 | 20 Human resources              | Field coordinators (FCs)                    | ₹ 4,11,196 | ₹ 4,02,155 | ₹ 4,48,906 | ₹ 4,59,767 | ₹ 17,22,024 |                    | 55%             | 45%       |       | ₹ 2,25,893                                              | ₹ 2,20,926 | ₹ 2,46,609 | ₹ 2,52,576 | ₹ 9,46,005  |
| 24 | 21 Procurement of medical items | GeneXpert, test cartridge                   | ₹ 1,29,006 | ₹ 6,26,923 | ₹ 6,20,888 | ₹ 3,39,489 | ₹ 17,16,306 | Unit cost USD11.26 | 100%            | 0%        |       | ₹ 1,29,006                                              | ₹ 6,26,923 | ₹ 6,20,888 | ₹ 3,39,489 | ₹ 17,16,306 |
| 25 | 22 Procurement of medical items | Contingency, drugs                          | ₹ 38,127   | ₹ 98,864   | ₹ 1,28,695 | ₹ 1,65,859 | ₹ 4,31,545  |                    | 0%              | 100%      |       | ₹ -                                                     | ₹ -        | ₹ -        | ₹ -        | ₹ -         |
| 26 | 23 Procurement of medical items | Contingency, chest X-rays                   | ₹ 1,32,823 | ₹ 2,57,945 | ₹ 3,39,280 | ₹ 2,11,545 | ₹ 9,41,593  |                    | 100%            | 0%        |       | ₹ 1,32,823                                              | ₹ 2,57,945 | ₹ 3,39,280 | ₹ 2,11,545 | ₹ 9,41,593  |
| 27 | 24 Procurement of medical items | Contingency, sputum microscopy              | ₹ 11,280   | ₹ 3,980    | ₹ 13,400   | ₹ 9,200    | ₹ 37,860    |                    | 100%            | 0%        |       | ₹ 11,280                                                | ₹ 3,980    | ₹ 13,400   | ₹ 9,200    | ₹ 37,860    |
| 28 | 25 Procurement of medical items | Extra-pulmonary TB diagnostics              | ₹ 10,986   | ₹ 33,907   | ₹ 73,800   | ₹ 69,324   | ₹ 1,88,017  |                    | 100%            | 0%        |       | ₹ 10,986                                                | ₹ 33,907   | ₹ 73,800   | ₹ 69,324   | ₹ 1,88,017  |
| 29 | 26 Procurement of medical items | Complications and hospitalization           | ₹ 25,719   | ₹ 45,597   | ₹ 42,386   | ₹ 36,111   | ₹ 1,49,813  |                    | 0%              | 100%      |       | ₹ -                                                     | ₹ -        | ₹ -        | ₹ -        | ₹ -         |
| 30 | 27 Procurement of medical items | Sputum containers (for transport)           | ₹ 8,894    | ₹ -        | ₹ -        | ₹ -        | ₹ 8,894     |                    | 100%            | 0%        |       | ₹ 8,894                                                 | ₹ -        | ₹ -        | ₹ -        | ₹ 8,894     |
| 31 | 28 Procurement of medical items | Customs duty and Xpert shipping             | ₹ 53,694   | ₹ 2,60,934 | ₹ 2,58,422 | ₹ 1,41,300 | ₹ 7,14,350  | Unit cost INR314   | 100%            | 0%        |       | ₹ 53,694                                                | ₹ 2,60,934 | ₹ 2,58,422 | ₹ 1,41,300 | ₹ 7,14,350  |
| 32 | 29                              | <i>Additional information</i>               |            |            |            |            |             |                    |                 |           |       |                                                         |            |            |            |             |
| 33 | 30                              | Cartridges used                             | 171        | 831        | 823        | 450        |             |                    |                 |           |       |                                                         |            |            |            |             |
| 34 | 31                              | Total TB diagnosed                          | 284        | 301        | 321        | 318        |             |                    |                 |           |       |                                                         |            |            |            |             |
| 35 | 32                              | Total TB treatments started                 | 279        | 297        | 314        | 308        |             | See Figure 4       |                 |           |       |                                                         |            |            |            |             |
| 36 | 33                              | Total treatment completed                   | 265        | 282        | 298        | 293        |             | Assumed at 95%     |                 |           |       |                                                         |            |            |            |             |

\* All cost figures are reported in Indian Rupee (INR or ₹)

\* The cost allocation is sourced from the time calculations in Supplementary File 2

\* The case-finding incentive (item 2) is derived from total cases diagnosed (item 31)

\* The treatment completion incentive (item 3) is derived from total treatment completed (item 33)

\* The GeneXpert costs (item 21 and 28) are derived from the actual consumption of the cartridges (item 30)

## Supplementary File 2: The time allocation of human resource between case-finding and treatment support activities

Table A: Detailed time allocation for human resource

| #   | Human Resource                | Activities                                                                            | Value | Comment                                                                                             |
|-----|-------------------------------|---------------------------------------------------------------------------------------|-------|-----------------------------------------------------------------------------------------------------|
| 1   | <b>Field coordinator (FC)</b> | Work hours (in hours)                                                                 | 48    | 6 working days, 8 hours a day; 5 day field work + 1 day reporting-review-planning-training          |
|     |                               | Total patients diagnosed per month                                                    | 105   | 100 - 110 patients diagnosed per month                                                              |
|     |                               | Average treatment duration per patient (in months)                                    | 7     | DSTB treatment duration of 6 - 8 months                                                             |
|     |                               | Patients per field coordinator, steady state                                          | 35    | 18 field coordinators in the program                                                                |
|     |                               | Travel per week (in hours)                                                            | 193   | 4 weeks in a month. Average travel reimbursement per field coordinator of ₹2700 at ₹3.5 per km.     |
| 1.1 |                               | <b>Travel time per week (in hours)</b>                                                | 10    | Average speed of 20 kmph                                                                            |
| 1.2 |                               | <b>Treatment support activities</b>                                                   |       |                                                                                                     |
|     |                               | Time per visit (in hours)                                                             | 1     | Half hour on average                                                                                |
|     |                               | Number of visits per patient in a month                                               | 3     | 3 times a month                                                                                     |
|     |                               | Total time spent per week in treatment support activities (in hours)                  | 13    |                                                                                                     |
| 1.3 |                               | <b>Case-finding activities</b>                                                        |       |                                                                                                     |
|     |                               | Time spent in ASHA (CHW) training per week (in hours)                                 | 2     | Average 1 meeting per week lasting nearly 2 hour                                                    |
|     |                               | Time spent in meeting individual ASHAs per week (in hours)                            | 2     | 4 ASHAs per week, 0.5 hour per meeting                                                              |
|     |                               | Time spent in hospital visits and assisting in diagnosis per week (in hours)          | 6     | 3 times a week, 2 hours per visit                                                                   |
|     |                               | Time spent in meeting referrals and screening per week (in hours)                     | 6     | 12 per week, 0.5 hour per visit                                                                     |
|     |                               | Total time spent per week in case-finding activities (in hours)                       | 16    |                                                                                                     |
| 1.4 |                               | <b>Reporting-review-planning-training, time spent per week (in hours)</b>             | 8     | 1 day                                                                                               |
| 2   | <b>Block coordinator (BC)</b> | Work hours (in hours)                                                                 | 48    | 6 working days, 8 hours a day                                                                       |
| 2.1 |                               | Admin-reporting-review-planning, time spent per week (in hours)                       | 8     | 1 complete day, focused around FCs in their area                                                    |
| 2.2 |                               | Block review-data management-project meeting-training, time spent per week (in hours) | 8     | Project meeting once a week, data management with MIS team, reviewing project performance, training |
| 2.3 |                               | Supervisory work, time spent per week (in hours)                                      | 32    | Split in proportion to FCs time spent in activities                                                 |
| 3   | <b>Managers</b>               | Work hours                                                                            | 48    | 6 working days, 8 hours a day                                                                       |
| 3.1 |                               | Review-planning-design, time spent per week (in hours)                                | 24    | 3 days a week, largely centered around case-finding                                                 |
| 3.2 |                               | Supervisory work, time spent per week (in hours)                                      | 24    | Split in proportion to BCs time spent in activities                                                 |
| 4   | <b>Data management team</b>   | Work hours                                                                            | 48    | Split in proportion of FCs time under reporting-review-planning                                     |

1  
2  
3  
4  
5  
6  
7  
8

| Table B: Summary of time allocation between case-finding and treatment support activities |                              |      |        |                                    |       |            |             |
|-------------------------------------------------------------------------------------------|------------------------------|------|--------|------------------------------------|-------|------------|-------------|
| Field coordinator (FC)                                                                    | Activity                     | Time | Travel | Reporting-review-planning-training | Total | Proportion | Assumptions |
| 1                                                                                         | Case-finding activities      | 16.0 | 5.3    | 4.4                                | 25.7  | 55%        | * Note      |
| 2                                                                                         | Treatment support activities | 13.1 | 4.3    | 3.6                                | 21.1  | 45%        |             |

9  
10  
11  
12  
13  
14  
15  
16  
17

| Block coordinator (BC) | Activity                     | Admin-reporting-review-planning | Block review-data management-project meeting-training | Supervisory work, time spent per week | Proportion |
|------------------------|------------------------------|---------------------------------|-------------------------------------------------------|---------------------------------------|------------|
| 1                      | Case-finding activities      | 4.4                             | 8.0                                                   | 17.6                                  | 62%        |
| 2                      | Treatment support activities | 3.6                             | 0.0                                                   | 14.4                                  | 38%        |

18  
19  
20  
21  
22  
23

| Managers | Activity                     | Review-planning-design | Supervisory work | Proportion |
|----------|------------------------------|------------------------|------------------|------------|
| 1        | Case-finding activities      | 24                     | 15.0             | 81%        |
| 2        | Treatment support activities | 0                      | 9.0              | 19%        |

24  
25  
26  
27  
28  
29  
30

| Data management team | Activity                     | Time | Proportion |
|----------------------|------------------------------|------|------------|
| 1                    | Case-finding activities      | 94.7 | 66%        |
| 2                    | Treatment support activities | 48.1 | 34%        |

31  
32  
33  
34  
35  
36  
37  
38  
39

| Table C: Proportion of time allocation for human resource |                        |              |                   |  |
|-----------------------------------------------------------|------------------------|--------------|-------------------|--|
| #                                                         | Human Resource         | Case-finding | Treatment support |  |
| 1                                                         | Field coordinator (FC) | 55%          | 45%               |  |
| 2                                                         | Block coordinator (BC) | 62%          | 38%               |  |
| 3                                                         | Managers               | 81%          | 19%               |  |
| 4                                                         | Data management team   | 66%          | 34%               |  |

40  
41  
42

**\* Note:** Time spent in travel and reporting-review-planning-training is proportionate to time spent in respective case-finding and treatment activities. It should be noted that FCs would have likely travelled to a village for both activities.

# BMJ Open

## Role of community health workers in improving cost efficiency in an active case finding tuberculosis program: An operational research study from rural Bihar, India

|                                 |                                                                                                                                                                                                                                                                                                                    |
|---------------------------------|--------------------------------------------------------------------------------------------------------------------------------------------------------------------------------------------------------------------------------------------------------------------------------------------------------------------|
| Journal:                        | <i>BMJ Open</i>                                                                                                                                                                                                                                                                                                    |
| Manuscript ID                   | bmjopen-2019-036625.R1                                                                                                                                                                                                                                                                                             |
| Article Type:                   | Original research                                                                                                                                                                                                                                                                                                  |
| Date Submitted by the Author:   | 24-Jun-2020                                                                                                                                                                                                                                                                                                        |
| Complete List of Authors:       | Garg, Tushar; Innovators In Health, Research<br>Bhardwaj, Manish; Innovators In Health, Operations<br>Deo, Sarang; Indian School of Business, Operations Management                                                                                                                                                |
| <b>Primary Subject Heading</b>: | Public health                                                                                                                                                                                                                                                                                                      |
| Secondary Subject Heading:      | Health economics, Global health, Infectious diseases                                                                                                                                                                                                                                                               |
| Keywords:                       | Public health < INFECTIOUS DISEASES, Tuberculosis < INFECTIOUS DISEASES, PUBLIC HEALTH, Health economics < HEALTH SERVICES ADMINISTRATION & MANAGEMENT, International health services < HEALTH SERVICES ADMINISTRATION & MANAGEMENT, Organisation of health services < HEALTH SERVICES ADMINISTRATION & MANAGEMENT |
|                                 |                                                                                                                                                                                                                                                                                                                    |

SCHOLARONE™  
Manuscripts





I, the Submitting Author has the right to grant and does grant on behalf of all authors of the Work (as defined in the below author licence), an exclusive licence and/or a non-exclusive licence for contributions from authors who are: i) UK Crown employees; ii) where BMJ has agreed a CC-BY licence shall apply, and/or iii) in accordance with the terms applicable for US Federal Government officers or employees acting as part of their official duties; on a worldwide, perpetual, irrevocable, royalty-free basis to BMJ Publishing Group Ltd ("BMJ") its licensees and where the relevant Journal is co-owned by BMJ to the co-owners of the Journal, to publish the Work in this journal and any other BMJ products and to exploit all rights, as set out in our [licence](#).

The Submitting Author accepts and understands that any supply made under these terms is made by BMJ to the Submitting Author unless you are acting as an employee on behalf of your employer or a postgraduate student of an affiliated institution which is paying any applicable article publishing charge ("APC") for Open Access articles. Where the Submitting Author wishes to make the Work available on an Open Access basis (and intends to pay the relevant APC), the terms of reuse of such Open Access shall be governed by a Creative Commons licence – details of these licences and which [Creative Commons](#) licence will apply to this Work are set out in our licence referred to above.

Other than as permitted in any relevant BMJ Author's Self Archiving Policies, I confirm this Work has not been accepted for publication elsewhere, is not being considered for publication elsewhere and does not duplicate material already published. I confirm all authors consent to publication of this Work and authorise the granting of this licence.

1  
2  
3  
4 **1 TITLE**

5  
6 2 Role of community health workers in improving cost efficiency in an active case finding  
7 3 tuberculosis program: An operational research study from rural Bihar, India  
8  
9

10 **4 MANUSCRIPT TYPE**

11  
12 5 Research article  
13

14 **6 AUTHORS**

15  
16 7 Tushar Garg<sup>1</sup>, Manish Bhardwaj<sup>1</sup>, Sarang Deo<sup>2</sup>  
17  
18 8

19 9 <sup>1</sup> Innovators In Health, Patna

20  
21 10 <sup>2</sup> Indian School of Business, Hyderabad  
22

23 **11 ADDRESS FOR CORRESPONDENCE**

24  
25 12 Tushar Garg,  
26  
27 13 Innovators in Health, #176, Ground Floor, Road #2,  
28 14 New Pataliputra Colony, Patna – 800013. Bihar. India.  
29  
30 15 Phone: +91 98286 09562  
31  
32 16 Email: [tgarg@innovatorsinhealth.org](mailto:tgarg@innovatorsinhealth.org)  
33

34 **17 MANUSCRIPT DETAILS**

35  
36 18 Abstract: 291 words

37 19 Manuscript: 3752 words

38  
39 20 Tables: 4

40  
41 21 Figures: 4  
42

43 **22 KEYWORDS**

44  
45 23 Accredited Social Health Activist, ASHA, Community Health Workers, Tuberculosis Active  
46 24 Case Finding, Cost Analysis  
47  
48  
49  
50  
51  
52  
53  
54  
55  
56  
57  
58  
59  
60

## 1 **ABSTRACT**

### 2 **Objectives**

3 Cost-efficient active case finding (ACF) approaches are needed for their large-scale  
4 adoption in national tuberculosis (TB) programs. Our aim was to assess if community health  
5 workers' (CHW) knowledge about families' health status can improve the cost-efficiency of  
6 the ACF program without adversely affecting the delivery of other health services for which  
7 they are responsible.

### 8 **Design**

9 Quasi-experimental design

### 10 **Interventions**

11 We evaluated an ACF program in the Samastipur district in Bihar, India, between July 2017  
12 and June 2018. CHWs called Accredited Social Health Activists generated referrals of  
13 individuals at risk of TB and conducted symptom-based screening to identify presumptive TB  
14 patients. They also helped them undergo testing and provided treatment support for  
15 confirmed TB cases.

### 16 **Primary and secondary outcome measures**

17 We compared the notification rate from the intervention region with that from a control region  
18 in the same district with similar characteristics. We analyzed operational data to calculate  
19 the cost per TB case diagnosed. We used routine programmatic data from the public health  
20 system to estimate the impact on other services provided by CHWs.

### 21 **Findings**

22 CHWs identified 9895 presumptive TB patients. Of these, 5864 patients were tested for TB,  
23 and 1236 were confirmed as TB cases. Annual public case notification rate increased  
24 sharply in the intervention region from 45.8 to 105.8 per 100,000 population, whereas it  
25 decreased from 50.7 to 45.3 in the control region. There was no practically or statistically  
26 significant impact on other output indicators of the CHWs, such as institutional deliveries (-  
27 0.04%). The overall cost of the intervention was about USD134 per diagnosed case. Main  
28 cost drivers were human resources, and commodities (drugs and diagnostics), which  
29 contributed 37.4% and 32.5% of the cost, respectively.

### 30 **Conclusions**

31 ACF programs that utilize existing CHWs in the health system are feasible, cost-efficient,  
32 and do not adversely affect other healthcare services delivered by CHWs.

33

## 1 **STRENGTHS AND LIMITATIONS OF THIS STUDY**

- 2 1. A pragmatic active case-finding implementation that utilized existing community health
- 3 workers in the health system.
- 4 2. Used a comparable control region to obtain the incremental effect of the intervention.
- 5 3. Purposively selected areas, hence, not a randomized control trial.
- 6 4. Patient costs incurred or averted and the national tuberculosis program costs not
- 7 included.
- 8 5. The small scale of the study and geographical location limit generalizability

For peer review only

## 1 INTRODUCTION

2 The World Health Organization (WHO) estimates about 10 million people were falling ill with  
3 tuberculosis (TB) and nearly 1.5 million dying of it in 2018.[1] Despite the continuous  
4 increase in case notifications in recent years, the 2018 estimates predict a gap of as much  
5 as 30% between the incident and notified cases globally. Progress toward WHO's target of a  
6 90% reduction in TB incidence rate by 2035 is severely limited by existing passive case-  
7 finding (PCF) approaches that wait for patients to seek care at a health facility.[2–4] As a  
8 result, these approaches fail to address significant barriers in accessing care, such as poor  
9 geographical and financial access, stigma, and poor awareness.[5]

10  
11 Active case-finding (ACF) can address these challenges by finding previously undetected  
12 cases and promptly initiating treatment.[4,6,7] Modeling studies estimate that such strategies  
13 can decrease TB incidence.[8,9] In contrast with passive approaches, ACF is a health  
14 system initiated screening process that uses context-specific diagnostic algorithms and  
15 accommodates various implementation strategies, including mass radiography, contact  
16 investigation, and house-to-house surveys.[6,10,11] Although modelling studies have shown  
17 ACF strategies to be cost-effective, cost per diagnosed case of such programs can be very  
18 high, thereby limiting their large-scale adoption.[8,12–14] As a result, there is limited  
19 empirical evidence from high-burden and resource-constrained settings to inform key  
20 operational decisions regarding ACF programs: who will conduct ACF activities, how will  
21 they be integrated within the health system, and how will these additional activities impact  
22 other health services.[15].

23  
24 In this study, we address these questions with evidence from a novel intervention in rural  
25 India that leveraged existing Community Health Workers (CHWs) in the public health system  
26 for ACF activities. In particular, our aim is to assess if CHWs' knowledge about health  
27 statuses of families can improve the cost-efficiency of the ACF program without adversely  
28 affecting the delivery of other health services for which they are responsible.

## 29 METHODS

### 30 Study design

31 Our intervention was implemented from May 15<sup>th</sup>, 2017, with state and district health  
32 administration's approval as an extension of routine services provided as part of the Revised  
33 National TB Control Program (RNTCP). We used a quasi-experimental design to evaluate  
34 the impact of the intervention over a period between July 1<sup>st</sup>, 2017 and June 30<sup>th</sup>, 2018. We

1 utilized the period between May 15<sup>th</sup>, 2017 and July 1<sup>st</sup>, 2017 in preparatory activities to  
2 launch the intervention.

#### 3 4 **Study setting**

5 Our study was conducted in the Samastipur district of the East Indian state of Bihar. In 2011,  
6 it had a population of about 42.6 million, of which 96.5% lived in rural areas. The literacy rate  
7 was 50.3%, and the sex ratio was 911.[16] The main source of income in more than 71.3%  
8 households was casual labor, and the highest individual income was less than INR5000  
9 (USD71) in 69.1% of households.[17] The total fertility rate in the district was 3.8, and the  
10 infant mortality rate was 53 deaths per 1000 live births.[18] More than 70% of births occurred  
11 at a healthcare institution.[19] In 2017, the annual TB case notification rate for the district  
12 was 55 per 100,000 population with a pre-treatment loss to follow-up (PTLFU) rate of 25%.  
13 In 2016, a successful treatment outcome was reported for 72% of the microbiologically  
14 confirmed (Bac+) new TB cases (44% of all cases).[20]

15  
16 The intervention region (IR) consisted of three blocks—Ujjarapur, Bibhutipur, and  
17 Sarairanjan—with a total population of 1,021,483.[Figure 1]. We chose four blocks—  
18 Kalyanpur, Warisnagar, Pusa, and Singhia—as the control region (CR) with a population of  
19 981,924.[21] The choice of these blocks was purposive with an emphasis on a similar  
20 population, sociodemographic and health system characteristics, and TB epidemiology.  
21 These were geographically separated from the IR to minimize the spill-over effects of the  
22 intervention.

23  
24 IR and CR were similar along relevant sociodemographic variables such as the proportion of  
25 the population belonging to scheduled castes (18.2% vs. 20.8%).[17][Table 1] Further, the  
26 structure of the public health systems in IR and CR was comparable on relevant dimensions.  
27 Each block in IR, as well as CR, coincided with a Tuberculosis Unit (TU) under the Revised  
28 National TB Control Program (RNTCP), which was managed by a Senior Treatment  
29 Supervisor (STS). IR and CR included four designated microscopy centers (DMCs) each,  
30 where sputum microscopy was provided. Finally, the annual TB case notification rate was  
31 comparable across IR and CR (52 vs. 53.1 per 100,000 population in 2016).[22]

1  
2  
3 1 Table 14  
5 2 The demographic characteristics of the intervention and control region in the active case-  
6  
7 3 finding project

| Characteristics                                                                      | Intervention region | Control region |
|--------------------------------------------------------------------------------------|---------------------|----------------|
| Blocks                                                                               | 3                   | 4              |
| Area (sq. km.)                                                                       | 582                 | 623            |
| Population                                                                           | 1021483             | 981924         |
| Sex ratio                                                                            | 918                 | 919            |
| Proportion of scheduled castes population                                            | 18.2%               | 20.8%          |
| Literacy rate                                                                        | 63.5%               | 59.8%          |
| Households with monthly income of highest earning household member less than INR5000 | 69.8%               | 70.6%          |

23  
24 425  
26 5 **Intervention**

27 6 We implemented an ACF intervention with the support of RNTCP and the National Health  
28  
29 7 Mission (NHM) and project funding from Stop TB Partnership's TB REACH. Under this  
30  
31 8 intervention, we engaged with community health workers (CHWs), locally known as  
32  
33 9 Accredited Social Health Activists (ASHAs), who work for the NHM. Their main role was  
34  
35 10 community mobilization and facilitating last-mile delivery of health services across multiple  
36  
37 11 programs though their focus is reproductive, maternal, and child health. Although ASHAs  
38  
39 12 were chosen from literate women between 25 and 45 years of age with a preference to  
40  
41 13 those educated up to the tenth standard, the criteria were relaxed if no such woman was  
42  
43 14 available in the village.[23] They received performance- and activity-linked remuneration, for  
44  
45 15 example, USD0.7 to report a newborn death within 24 hours, UDS2 to attend review  
46  
47 16 meetings, USD8 for antenatal care and institutional delivery, up to USD15 for promoting  
48  
49 17 contraception, and up to USD75 supporting TB treatment (USD15 for a new case, USD22  
50  
51 18 for a previously-diagnosed case, and USD75 for a drug-resistant TB case).[24,25] They  
52  
53 19 were supervised by ASHA facilitators—one each for about 20 ASHAs—and a block  
54  
55 20 community mobilizer at the block level.

56  
57 21

58  
59 22 We trained these ASHAs to identify patients with TB symptoms during their routine work and  
60  
61 23 refer them to a field coordinator (FC). The FCs further screened these patients using a  
62  
63 24 symptom-based tool after obtaining their verbal consent.[10] Presumptive TB patients

1 identified through screening were accompanied by ASHAs to the nearest PHC for diagnostic  
2 testing and physician consultation. All presumptive TB patients underwent sputum  
3 microscopy and chest X-ray (CXR). GeneXpert testing, if indicated by the diagnostic  
4 protocol, was conducted at the laboratory operated using project resources.[Figure 2] Even if  
5 CXR and sputum microscopy results were not abnormal, physicians could order a  
6 GeneXpert based on the clinical presentation. We used the standard diagnostic algorithm  
7 that is recommended by the RNTCP.[26] However, RNTCP recommendation of universal  
8 drug susceptibility testing by GeneXpert for all TB cases was being rolled out in phases and  
9 was only available in the IR as a part of the intervention.[27]

10  
11 Upon confirmation of TB diagnosis, ASHA obtained drugs from the STS and initiated  
12 treatment at patient's residence. For each confirmed case of TB, the project paid INR200  
13 (USD3) to ASHA for referral and INR300 (USD4.5) to ASHA for assisting in diagnosis and  
14 treatment initiation. ASHAs counselled patients on the importance of adherence and  
15 treatment completion and monitored them for adverse effects through regular follow-up  
16 household visits. They received INR400 (USD6) after their first follow-up visit and INR600  
17 (USD9) upon successful completion of treatment. In addition to these patient-focused  
18 activities, we also organized community meetings periodically to improve awareness of TB  
19 and available services under the project.

20  
21 The project team was led by a program manager, who supervised three project managers  
22 responsible for operations, community engagement and monitoring and evaluation. Project  
23 manager for operations managed a team of block coordinators (BCs), one for each block in  
24 the intervention region, who managed a team of 6-7 field coordinators (FCs). Each FC  
25 covered a population of around 50,000, was responsible for training and supervision of 35-  
26 45 ASHAs, and helped with patient monitoring and community mobilization. Supervision  
27 involved visiting patients along with ASHA, assisting the ASHAs in keeping record and filing  
28 RNTCP paperwork, and assisting ASHAs in troubleshooting across the care pathway. Also,  
29 the team included three data entry operators (DEO), data coordinator (DC), lab technician,  
30 and a sputum carrier.[Figure 3]

### 31 32 **Cost framework**

33 We used a top-down approach from the provider perspective for costing that included only  
34 costs incurred in the intervention. We defined cost-efficiency in operational terms of cost per



1  
2  
3 1 case detected to distinguish it from the more conventional term of cost-effectiveness, which  
4 2 is typically measured as cost per QALY (quality-adjusted life years) gained or DALY  
5 3 (disability-adjusted life years) averted.  
6  
7  
8 4

## 5 **Data**

6 **Patient data.** We recorded individual patient information related to referral, screening,  
7 diagnosis, and treatment follow-up in paper forms. These were linked by a unique patient  
8 identifier and maintained in separate patient folders along with copies of the patient's  
9 diagnostic records. Each FC maintained folders for patients in their respective catchment  
10 areas, which were audited weekly by the BC. Trained DEOs entered data from completed  
11 forms in a patient database designed in Microsoft Excel 2016. Two DEOs checked at least  
12 one-fifth of records entered in the database for completeness and errors introduced during  
13 data entry. Besides, DC also conducted monthly audits of the patient database. Appropriate  
14 measures were taken to ensure safe-keeping of the confidential patient records.  
15

16 **Cost data.** Each expense was first recorded on a paper-based voucher. A project manager  
17 verified each voucher, assigned it to one of the budget categories—staffing, activities (e.g.,  
18 training programs), health commodities and services (GeneXpert, CXR), and administrative  
19 overheads—and entered the information in computer-based accounting software, Tally 11®.  
20 The program manager reconciled monthly expenses against the project budget.  
21

22 **Program data.** We obtained data on quarterly TB case notifications for each block from the  
23 district program office. We also extracted monthly data on three maternal and child health  
24 indicators representing ASHA's key activities from the NHM Health Statistics Information  
25 Portal.[28] These included the number of pregnant women registered for antenatal care  
26 (ANC), the number of institutional deliveries, and the number of immunization sessions  
27 where ASHA was present. The program data was obtained after the intervention, whereas  
28 the patient and cost data were collected in tandem with the intervention.  
29

## 30 **Analysis**

31 We calculated the quarterly flow of patients at each stage of the care pathway: referrals  
32 eligible for screening, patients screened, presumptive TB patients identified, patients tested,  
33 patients with confirmed TB diagnosis, and confirmed TB cases initiated on treatment. We  
34 defined the pre-diagnostic loss to follow-up as the proportion of presumptive TB patients

1 who were not tested, and the pre-treatment loss to follow-up as the proportion of patients  
2 diagnosed with TB who were not initiated on treatment. We used the number of notified TB  
3 cases to calculate annual case notification rates per 100,000 population for IR and CR.

4  
5 We calculated the quarterly averages for indicators on ASHAs' performance and mapped  
6 them to the baseline period (Q3 of 2016 to Q2 of 2017) and the study period (Q3 of 2017 to  
7 Q2 of 2018).

8  
9 To calculate the intervention cost, we included all components of operational expenses (i.e.,  
10 excluding capital expenditure) that were incurred over and above routine programmatic  
11 activities under RNTCP. We divided these costs between case-finding and treatment  
12 categories based on actuals or the amount of time spent by the staff on the different  
13 activities estimated through semi-structured interviews. We used an exchange rate of INR67  
14 per USD for all costs.[Supplementary file 1]

15  
16 We divided FCs' workday into three components: travel, case-finding activities, and  
17 treatment support activities. We estimated the time spent on the latter two based on actual  
18 time taken for each activity per patient and average patient load per FC. We calculated  
19 travel time based on the average monthly travel reimbursement amount and allocated to it  
20 between case-finding and treatment support activities in proportion to their time spent on  
21 each of these. A similar analysis was repeated for BCs and project managers with some  
22 salient differences. We did not consider travel expenses for BCs and project managers as  
23 the amount of time spent by them on travel was minimal. The time spent by these staff  
24 members in supervision was allocated to case-finding and treatment support activities in the  
25 proportion of the time allocated by their team members on these two categories. Finally, the  
26 data management's time was divided into case-finding and treatment support categories in  
27 proportion to the total time spent by FCs, BCs, and project managers.[Supplementary file 2]

## 28 29 **Patient and public involvement**

30 We neither involved patients in study design nor in the interpretation of findings.

## 31 **FINDINGS**

32 From July 2017 to June 2018, the project received 12394 referrals eligible for screening. Of  
33 these, 11233 patients were screened for symptoms of TB, 9895 patients with symptoms of  
34 TB were identified. Of these, 5864 patients were tested for TB, whereas the remaining

1 40.7% were classified as the pre-diagnostic loss to follow up. Of those tested, 1236 patients  
 2 were diagnosed with TB, with 51.5% of those being confirmed with a microbiological test. Of  
 3 the diagnosed patients, 1194 patients were initiated on TB treatment yielding a pre-  
 4 treatment loss to follow-up of only 3.4%.[Figure 4][Supplementary file 3, 4]

5  
 6 The notification rate in IR increased from 45.8 at baseline to 105.8 during the study period  
 7 per 100000 population but decreased from 50.7 to 45.3 in CR. Similarly, the annual  
 8 notification rate per 100,000 population for microbiologically-confirmed TB increased from  
 9 20.4 to 40.2 in IR but decreased from 29.3 to 22.8 in CR.[Table 2]

10  
 11 Table 2

12 TB case notification rates per 100,000 population in the public sector in the intervention and  
 13 control region of the active case-finding project

| Year | Quarter | IR   |           | CR   |           |
|------|---------|------|-----------|------|-----------|
|      |         | Bac+ | All cases | Bac+ | All cases |
| 2016 | Q3      | 5.8  | 11.8      | 7.5  | 13.9      |
|      | Q4      | 4.3  | 9.8       | 5.7  | 11.7      |
|      | Q1      | 5.4  | 11.4      | 7.6  | 12.4      |
| 2017 | Q2      | 4.9  | 12.8      | 8.5  | 12.7      |
|      | Q3      | 7.2  | 22.3      | 6.1  | 10.2      |
|      | Q4      | 9.5  | 26        | 5.4  | 9.5       |
| 2018 | Q1      | 9.6  | 27.7      | 6    | 12.6      |
|      | Q2      | 13.9 | 29.8      | 5.3  | 13        |

15  
 16 IR: Intervention region

17 CR: Control region

18 Bac+: Microbiologically-confirmed TB cases

19  
 20 The overall average cost per diagnosed patient over the duration of the project was  
 21 USD133.9, varying from a minimum of USD114 in Q3 2017 to a maximum of USD154.7 in  
 22 Q4 2017. The main contributors to the cost were human resources (37.4%) and medical  
 23 commodities (32.5%). Project activities and administrative overhead contributed to 20% and  
 24 10% of the cost, respectively.[Table 3]

Table 3

Costs incurred in the active case-finding program from Q3 of 2017 to Q2 of 2018.

| Categories                          | 2017 Q3   | 2017 Q4   | 2018 Q1    | 2018 Q2   | Total       | Proportion |
|-------------------------------------|-----------|-----------|------------|-----------|-------------|------------|
| Activities                          | ₹4,33,837 | ₹5,01,876 | ₹6,20,093  | ₹6,66,326 | ₹22,22,132  | 20.0%      |
| Administrative overheads            | ₹3,34,235 | ₹2,77,192 | ₹2,53,173  | ₹2,42,279 | ₹11,06,879  | 10.0%      |
| Human resources                     | 5         | 1         | ₹9,34,772  | ₹9,96,832 | ₹41,52,300  | 37.4%      |
| Commodities (drugs and diagnostics) | ₹10,53,51 | ₹11,67,18 | ₹13,05,790 | ₹7,70,858 | ₹36,07,020  | 32.5%      |
|                                     | ₹3,46,683 | ₹9        | ₹          | ₹26,76,29 | ₹1,10,88,33 |            |
| Grand Total                         | 0         | 8         | 31,13,828  | 5         | 1           |            |
| TB cases diagnosed                  | 284       | 302       | 324        | 326       | 1236        |            |
| Cost per TB diagnosed (INR)         | ₹7,635    | ₹10,364   | ₹9,611     | ₹8,209    | ₹8,971      |            |
| Cost per TB diagnosed (USD)         | \$114.0   | \$154.7   | \$143.4    | \$122.5   | \$133.9     |            |

Exchange rate: 1 USD (\$) = 67 INR (₹)

1 The number of pregnant women registered for ANC increased by 6.1% and 3.8% in IR and  
 2 CR, respectively. The number of institutional deliveries increased by 2.6% in IR as well as  
 3 CR. Finally, the number of immunization sessions where an ASHA was present increased in  
 4 IR by 0.2% but decreased by 2.8% in CR.[Table 4]

5  
 6 Table 4

7 ASHA's performance on reproductive, maternal, and child health program indicators in the  
 8 intervention and control region in the active case-finding program

| Indicator                                                |    | Baseline | Study period | Change |
|----------------------------------------------------------|----|----------|--------------|--------|
| Number of pregnant women registered for ANC              | IR | 5911     | 6270         | 6.1%   |
|                                                          | CR | 6098     | 6327         | 3.8%   |
| Number of institutional deliveries conducted             | IR | 3962     | 4065         | 2.6%   |
|                                                          | CR | 3560     | 3654         | 2.6%   |
| Number of immunisation sessions where ASHAs were present | IR | 2550     | 2555         | 0.2%   |
|                                                          | CR | 2716     | 2639         | -2.8%  |

9 All numbers are quarterly averages

10 Baseline period: Q3 of 2016 to Q2 of 2017

11 Study period: Q3 of 2017 to Q2 of 2018

12 IR: Intervention region

13 CR: Control region

14 ASHA: Accredited Social Health Activist

15 ANC: Antenatal checkup

16

## 17 DISCUSSION

18 ACF has been widely recommended for the early identification and treatment of patients.[29]

19 Several modelling studies in various contexts, including India, China, and Uganda, have  
 20 shown it to be cost-effective.[8,15,30,31] However, large-scale adoption of health  
 21 interventions in resource-limited settings often requires cost-efficiency in addition to cost-  
 22 effectiveness. Unfortunately, there is limited and mixed evidence on cost-efficient strategies  
 23 in high prevalence, resource-limited settings [15,32]. In this paper, we report on one such  
 24 intervention that leveraged existing CHWs in the health system and their knowledge about  
 25 community health status to drive cost-efficiency. The intervention resulted in a significant

1  
2  
3 1 increase in the notification rate at the cost of about USD134 per case diagnosed. In addition,  
4 2 the involvement of CHW in TB services did not adversely impact their existing tasks.  
5  
6 3

7  
8 4 It has been suggested that leveraging existing CHWs to integrate TB screening services with  
9 5 other community health programs like child immunization can be effective.[31] However, our  
10 6 study is one of the first to demonstrate the practical feasibility of this approach. CHWs have  
11 7 extensive knowledge of the health system and are also trusted members of their  
12 8 communities. Consequently, they can leverage their unique position by acting as patient  
13 9 navigators and ensuring that they complete their pathways to treatment completion.[33–35]  
14 10 Involving CHWs can also aid in engaging other actors like informal health providers and  
15 11 community in the way they referred people to be screened in our intervention. Their role,  
16 12 although, was ancillary while the FCs screened and diagnosis and treatment activities for  
17 13 such cases were undertaken by the CHWs.  
18 14

19 15 The unit cost of our intervention was substantially lower than that of other ACF interventions  
20 16 in the recent past. In Cambodia, ACF strategies using CHWs report a cost ranging from  
21 17 USD249 for door-to-door screening to USD316 for symptomatic.[14] A household contact  
22 18 investigation strategy in urban Uganda reported a cost of USD444 per additional case  
23 19 diagnosed.[31] One of the main drivers for the significant cost-efficiency of our intervention is  
24 20 that it, unlike door-to-door surveys or mass screening, relies on CHWs' experience and  
25 21 understanding of the community to find people at risk of TB. This approach is particularly  
26 22 useful and relevant in settings where TB incidence is evenly spread in the general  
27 23 population, and it may not be possible to target specific high-risk population segments as  
28 24 recommended by WHO guidelines.[10] In particular, CHWs use their own social network to  
29 25 filter referrals from the larger population and enrich the stream of presumptive cases  
30 26 compared to what would have been possible with door-to-door screening. The lower loss to  
31 27 follow-up, mentioned earlier, also lowers the cost per case diagnosed and initiated on  
32 28 treatment.[36] Another Indian intervention that used CHWs to conduct door-to-door  
33 29 screening in a tribal population reported a cost of USD31 per patient, excluding drugs and  
34 30 diagnostics. Similar components in our intervention costed USD91 per patient. The main  
35 31 driver for lower cost in that intervention was a high incidence rate in the community (more  
36 32 than ten times the national estimate) and a smaller catchment area (approximately 1/9<sup>th</sup> of  
37 33 our study population), which resulted in significantly lower staffing and administrative  
38 34 cost.[37,38] However, the difference in costs needs to be interpreted with caution as studies  
39 35 vary substantially in their context (choice of ACF strategy, intervention design and diagnostic

1  
2  
3 1 algorithm, TB epidemiology, and health system characteristics) as well as their costing  
4 2 methodology (costing perspective (patient, provider, societal) and outcome measure).  
5 3 [39,40]  
6  
7  
8  
9

10 5 The key factors in explaining the efficacy of ASHAs in case finding in our intervention are the  
11 6 incentives and the level of supervision that they received. The amount of incentive to ASHAs  
12 7 was competitive in comparison to their other activities, as shown above. However, its  
13 8 untimely disbursement is a shortcoming of the routine programs and likely a reason ASHA  
14 9 partnered with our intervention, where such disbursements were prompt.[41] Further, ASHA's  
15 10 motivation is also dependent on her social and contextual environment, amongst other  
16 11 factors, and it was also experienced in our implementation.[42,43] ASHA's engagement level  
17 12 varied widely and it likely impacted the yield as well. Nonetheless, her remuneration is not  
18 13 considered commensurate with those of other health personnel and, overall, insufficient for  
19 14 the work they put in.[44–46] The drivers of engagement and the role of incentives in the  
20 15 poorly understood decision-making process of ASHA deserves further investigation. In a  
21 16 constrained health system, there are perennial concerns about overburdening CHWs with  
22 17 new tasks, thereby resulting in poor program outcomes on the existing tasks.[47–49] In this  
23 18 context, it is encouraging that involvement of CHWs in TB ACF activities did not adversely  
24 19 affect their performance on tasks related to maternal and child health. Any changes in  
25 20 indicators were small and of limited pragmatic significance.[Table 4] Our results agree with  
26 21 evidence from Tanzania regarding the ability of CHWs to handle multiple roles in the HIV  
27 22 program as well as maternal and child health programs. In particular, that study did not find  
28 23 a significant difference between the trajectory of monthly HIV visits by CHWs after they were  
29 24 assigned additional tasks related to maternal and child health.[48] However, any integration  
30 25 of CHWs in other programs should carefully assess factors affecting their capacity and  
31 26 performance. In India, their training and education levels vary widely, and poor motivation  
32 27 and inadequate supportive supervision are well known limiting factors.[50–52]  
33  
34  
35  
36  
37  
38  
39  
40  
41  
42  
43  
44  
45  
46  
47  
48  
49  
50  
51  
52  
53  
54  
55  
56  
57  
58  
59  
60

29 Although the intervention produced encouraging results, there was heterogeneity in the  
30 30 performance metrics across the blocks, over time, and across ASHAs.[Supplementary file 4]  
31 31 Further efforts are needed to understand this heterogeneity better and use it for  
32 32 benchmarking and program improvement. Moreover, addressing the pre-diagnostic loss to  
33 33 follow-up will likely improve the yield in such a program. Its responsible factors are poor  
34 34 support at the family and health centre level, inadequate services in the health system, and  
35 35 stigma.[53] Future efforts should focus on empowerment of ASHAs and patients, and

1 ameliorating the health system deficiencies. Its transition to a fully integrated component of  
2 the mainstream public health system is non-trivial, and past evidence of such integration,  
3 both in India and elsewhere, is mixed.[54,55] A successful transition will require seamless  
4 interface between CHWs and senior RNCTP staff, such as the STS. During the intervention,  
5 the field team enabled this link through supportive supervision of CHWs, which is known to  
6 be a major enabler for the successful extension of CHWs' role to generate favorable  
7 outcomes.[56,57] Going forward, it would be crucial to develop a cadre of supervisors within  
8 the program who will fulfill this function. In the absence of this supervisory capacity, each  
9 STS will have to manage 150-200 CHWs, which may not be effective. Our analysis provides  
10 a framework for calculating the cost of building this supervisory capacity, which can be  
11 incorporated in the states' annual budgeting cycles through their project implementation  
12 plan.

13  
14 The main strengths of our study emanate from the fact that our intervention was a pragmatic  
15 ACF implementation that utilized existing CHWs in the health system. The study was  
16 conducted in a routine programmatic site, which simulated a typical low-resource setting  
17 environment with a regular health system. We also utilized routine programmatic data on  
18 case notifications for impact evaluation and other health outputs to capture any externality  
19 on the provision of other health services. We used a comparable control region within the  
20 same district to obtain the intervention's incremental effect over and above other secular  
21 changes in program implementation. Finally, we had access to granular activity-level costing  
22 data, which limited (but did not eliminate) the need to allocate indirect costs.

23  
24 However, our study also has some limitations. First, it was not designed as a randomized  
25 control trial. We purposively chose blocks in the IR based on the catchment area of the prior  
26 work done by the community-based organization that led this intervention. The CR, though  
27 similar to the IR in many important and relevant aspects, was also purposively chosen. As a  
28 result, we cannot rigorously claim that the impact calculated from our study is caused by the  
29 intervention and is representative at the state or national level. Second, we focused only on  
30 the incremental health system cost incurred by the intervention and did not include patient  
31 costs incurred or averted as well as costs incurred by the RNTCP to coordinate with our  
32 intervention. Finally, the limited duration of our intervention did not allow us to capture  
33 longer-term health outcomes such as successful treatment completion and impact on TB  
34 epidemiology. Careful accounting of these costs and benefits would be needed to conduct a



1  
2  
3 1 comprehensive cost-effectiveness analysis of a national scale-up of our intervention from a  
4 2 societal perspective.  
5

6  
7 3 **CONCLUSION**  
8

9 4 Leveraging existing CHWs in the health system can enhance cost-efficiency of tuberculosis  
10 5 active case finding programs without adversely affecting the delivery of other healthcare  
11 6 services in their portfolio. National scale-up of this approach for tuberculosis active case  
12 7 finding will require detailed understanding of existing capacity utilization of CHWs due to  
13 8 their routine tasks and the importance of supportive supervision in helping them effectively  
14 9 manage the new task in addition to the routine ones.  
15  
16  
17  
18  
19  
20  
21  
22  
23  
24  
25  
26  
27  
28  
29  
30  
31  
32  
33  
34  
35  
36  
37  
38  
39  
40  
41  
42  
43  
44  
45  
46  
47  
48  
49  
50  
51  
52  
53  
54  
55  
56  
57  
58  
59  
60

## 1 **ADDITIONAL INFORMATION**

### 2 **Acknowledgement**

3 We acknowledge the efforts of the Accredited Health Social Activists and the project team at  
4 Innovators In Health. This work was presented at the 50th Union World Conference on Lung  
5 Health 2019, and we thank the audience for their comments.

### 6 **Competing interest**

7 None declared

### 8 **Funding**

9 This project was supported by the Stop TB Partnership's TB REACH initiative and was  
10 funded by the Government of Canada and the Bill & Melinda Gates Foundation. Manish  
11 Bhardwaj was supported by a Grand Challenges Explorations grant number OPP1190735  
12 from the Bill & Melinda Gates Foundation. Neither funders had any role in the study design,  
13 data collection and analysis, decision to publish, or preparation of the manuscript.

### 14 **Ethics approval**

15 Ethical approval was obtained from the Institutional Review Board at Indian School of  
16 Business, Hyderabad. The board waived the informed consent requirement for the study.  
17 Further, only aggregate intervention data was used for the analysis.

### 18 **Author contribution**

19 Funding acquisition: MB, TG  
20 Conceptualization of the intervention: TG, MB  
21 Conceptualization of the analysis: TG, SD  
22 Data collection: TG  
23 Data analysis and interpretation: TG, SD  
24 Writing — original draft: TG  
25 Writing — review and edits: TG, SD, MB

### 26 **Data sharing**

27 The cost, program, and yield data used in the study are available in Supplementary Files 1,  
28 3, 4, respectively.

## 1 REFERENCES

- 2 1 World Health Organization. *Global tuberculosis report 2019*. World Health Organization  
3 2019. <https://apps.who.int/iris/handle/10665/329368> (accessed 18 Oct 2019).
- 4 2 World Health Organization. *Implementing the end TB strategy: the essentials*. Geneva: :  
5 World Health Organization 2015. <https://apps.who.int/iris/handle/10665/206499>
- 6 3 Houben RMGJ, Menzies NA, Sumner T, *et al*. Feasibility of achieving the 2025 WHO  
7 global tuberculosis targets in South Africa, China, and India: a combined analysis of 11  
8 mathematical models. *The Lancet Global Health* 2016;**4**:e806–15. doi:10/f9b2vh
- 9 4 Yuen CM, Amanullah F, Dharmadhikari A, *et al*. Turning off the tap: stopping  
10 tuberculosis transmission through active case-finding and prompt effective treatment.  
11 *The Lancet* 2015;**386**:2334–43. doi:10/f73mmd
- 12 5 Wells WA. Onions and prevalence surveys: how to analyze and quantify tuberculosis  
13 case-finding gaps. *The International Journal of Tuberculosis and Lung Disease*  
14 2017;**21**:1101–13. doi:10.5588/ijtld.17.0271
- 15 6 Uplekar M, Creswell J, Ottmani S-E, *et al*. Programmatic approaches to screening for  
16 active tuberculosis [State of the art series. Active case finding/screening. Number 6 in  
17 the series]. *The International Journal of Tuberculosis and Lung Disease* 2013;**17**:1248–  
18 56. doi:10/f5hbxx
- 19 7 Kranzer K, Afnan-Holmes H, Tomlin K, *et al*. The benefits to communities and individuals  
20 of screening for active tuberculosis disease: a systematic review. *Int J Tuberc Lung Dis*  
21 2013;**17**:432–46. doi:10.5588/ijtld.12.0743
- 22 8 Azman AS, Golub JE, Dowdy DW. How much is tuberculosis screening worth?  
23 Estimating the value of active case finding for tuberculosis in South Africa, China, and  
24 India. *BMC Medicine* 2014;**9**:9. doi:10/gb33tt
- 25 9 Dowdy DW, Lotia I, Azman AS, *et al*. Population-Level Impact of Active Tuberculosis  
26 Case Finding in an Asian Megacity. *PLoS ONE* 2013;**8**:e77517. doi:10/gcz84s
- 27 10 World Health Organization. Systematic screening for active tuberculosis: principles and  
28 recommendations. 2013.
- 29 11 Golub JE, Mohan CI, Comstock GW, *et al*. Active case finding of tuberculosis: historical  
30 perspective and future prospects. *The International Journal of Tuberculosis and Lung*  
31 *Diseas* 2005;**9**:1183–203.
- 32 12 Saunders MJ, Tovar MA, Collier D, *et al*. Active and passive case-finding in tuberculosis-  
33 affected households in Peru: a 10-year prospective cohort study. *The Lancet Infectious*  
34 *Diseases* 2019;**19**:519–28. doi:10/gf6mj8
- 35 13 Kranzer K, Lawn SD, Meyer-Rath G, *et al*. Feasibility, Yield, and Cost of Active  
36 Tuberculosis Case Finding Linked to a Mobile HIV Service in Cape Town, South Africa:  
37 A Cross-sectional Study. *PLoS Medicine* 2012;**9**:e1001281. doi:10/gdxx8c

- 1  
2  
3 1 14 James R, Khim K, Boudarene L, *et al.* Tuberculosis active case finding in Cambodia: a  
4 2 pragmatic, cost-effectiveness comparison of three implementation models. *BMC Infect*  
5 3 *Dis* 2017;**17**:580. doi:10/gdxs8g  
6  
7 4 15 Dobler CC. Screening strategies for active tuberculosis: focus on cost-effectiveness.  
8 5 *ClinicoEconomics and Outcomes Research* 2016;**8**:335–47. doi:10/gdxtmw  
9  
10 6 16 Registrar General of India. Census of India 2011. Office of the Registrar General Census  
11 7 Commissioner, India 2011.  
12  
13 8 17 Socio-Economic Caste Census 2011. Ministry of Rural Development, Government of  
14 9 India <https://secc.gov.in/> (accessed 31 Aug 2019).  
15  
16 10 18 Annual Health Survey 2011-12, Bihar Factsheet. New Delhi: : Office of the Registrar  
17 11 General & Census Commissioner  
18 12 [http://www.censusindia.gov.in/vital\\_statistics/AHSBulletins/AHS\\_Factsheets\\_2011\\_12/Bi](http://www.censusindia.gov.in/vital_statistics/AHSBulletins/AHS_Factsheets_2011_12/Bihar_Factsheet_2011-12.pdf)  
19 13 [har\\_Factsheet\\_2011-12.pdf](http://www.censusindia.gov.in/vital_statistics/AHSBulletins/AHS_Factsheets_2011_12/Bihar_Factsheet_2011-12.pdf) (accessed 3 Feb 2019).  
20  
21 14 19 International Institute for Population Sciences. NFHS 4 Factsheet Samastipur.  
22 15 International Institute for Population Sciences  
23 16 [http://rchiips.org/nfhs/FCTS/BR/BR\\_FactSheet\\_221\\_Samastipur.pdf](http://rchiips.org/nfhs/FCTS/BR/BR_FactSheet_221_Samastipur.pdf) (accessed 3 Feb  
24 17 2019).  
25  
26 18 20 Central TB Division. India TB Report 2018. New Delhi, India: : Directorate General of  
27 19 Health Services, Ministry of Health and Family Welfare, Government of India 2018.  
28 20 <https://tbcindia.gov.in/showfile.php?lid=3314> (accessed 18 Nov 2019).  
29  
30 21 21 Blok L, Creswell J, Stevens R, *et al.* A pragmatic approach to measuring, monitoring and  
31 22 evaluating interventions for improved tuberculosis case detection. *International Health*  
32 23 2014;**6**:181–8. doi:10.1093/inthealth/ihu055  
33  
34 24 22 District TB Report, Samastipur. District TB Cell, Revised National TB Control Program  
35 25 2017.  
36  
37 26 23 About Accredited Social Health Activist (ASHA). National Health Mission.  
38 27 <https://nhm.gov.in/index1.php?lang=1&level=1&sublinkid=150&lid=226> (accessed 29  
39 28 May 2020).  
40  
41 29 24 Update on ASHA Programme. New Delhi: : National Health Mission, Ministry of Health  
42 30 and Family Welfare 2018. <http://nhsrcindia.org/sites/default/files/asha%20reduced.pdf>  
43 31 (accessed 29 Jul 2019).  
44  
45 32 25 ASHA Incentives. 2018.<http://statehealthsocietybihar.org/asha/ASHAincentiveDetails.pdf>  
46 33 (accessed 29 May 2020).  
47  
48 34 26 Revised Technical & Operational Guidelines for Tuberculosis Control in India. New  
49 35 Delhi: : Central TB Division 2016.  
50 36 [https://www.tbcindia.gov.in/WriteReadData/Revised%20Technical%20and%20Operational](https://www.tbcindia.gov.in/WriteReadData/Revised%20Technical%20and%20Operational%20Guidelines/files/assets/basic-html/page-1.html#)  
51 37 [al%20Guidelines/files/assets/basic-html/page-1.html#](https://www.tbcindia.gov.in/WriteReadData/Revised%20Technical%20and%20Operational%20Guidelines/files/assets/basic-html/page-1.html#) (accessed 4 Feb 2019).  
52  
53 38 27 Guidelines on Programmatic Management of Drug-Resistant Tuberculosis in India. New  
54 39 Delhi: : Revised National Tuberculosis Control Programme, Central TB Division 2017.  
55  
56  
57  
58  
59  
60

- 1  
2  
3 1 <https://tbcindia.gov.in/WriteReadData/Guideline%20for%20PMDT%20in%20India%202017.zip>  
4 2  
5  
6 3 28 Ministry of Health & Family Welfare, Government of India. NHM Health Statistics  
7 4 Information Portal. NHM Health Statistics Information Portal. [https://nrhm-](https://nrhm-mis.nic.in/SitePages/Home.aspx)  
8 5 [mis.nic.in/SitePages/Home.aspx](https://nrhm-mis.nic.in/SitePages/Home.aspx) (accessed 4 Feb 2019).  
9  
10 6 29 Reid MJA, Arinaminpathy N, Bloom A, *et al.* Building a tuberculosis-free world: The  
11 7 Lancet Commission on tuberculosis. *The Lancet* 2019;**393**:1331–84. doi:10/gfxc87  
12  
13 8 30 Mupere E, Schiltz NK, Mulogo E, *et al.* Effectiveness of active case-finding strategies in  
14 9 tuberculosis control in Kampala, Uganda. *The International Journal of Tuberculosis and*  
15 10 *Lung Disease* 2013;**17**:207–13. doi:10/gdxx8d  
16  
17 11 31 Sekandi JN, Dobbin K, Oloya J, *et al.* Cost-effectiveness analysis of community active  
18 12 case finding and household contact investigation for tuberculosis case detection in urban  
19 13 Africa. *PLoS ONE* 2015;**10**:e0117009. doi:10.1371/journal.pone.0117009  
20  
21 14 32 Lung T, Marks GB, Nhung NV, *et al.* Household contact investigation for the detection of  
22 15 tuberculosis in Vietnam: economic evaluation of a cluster-randomised trial. *The Lancet*  
23 16 *Global Health* 2019;**7**:e376–84. doi:10/gf5tdz  
24  
25 17 33 Mishra A. ‘Trust and teamwork matter’: Community health workers’ experiences in  
26 18 integrated service delivery in India. *Global Public Health* 2014;**9**:960–74. doi:10/gf6k98  
27  
28 19 34 Yellapa V, Devadasan N, Krumeich A, *et al.* How patients navigate the diagnostic  
29 20 ecosystem in a fragmented health system: a qualitative study from India. *Global Health*  
30 21 *Action* 2017;**10**:1350452. doi:10/gf2pcd  
31  
32 22 35 Subbaraman R, Nathavitharana RR, Mayer KH, *et al.* Constructing care cascades for  
33 23 active tuberculosis: A strategy for program monitoring and identifying gaps in quality of  
34 24 care. *PLOS Medicine* 2019;**16**:e1002754. doi:10/gf38sz  
35  
36 25 36 Subbaraman R, Nathavitharana RR, Satyanarayana S, *et al.* The Tuberculosis Cascade  
37 26 of Care in India’s Public Sector: A Systematic Review and Meta-analysis. *PLOS*  
38 27 *Medicine* 2016;**13**:e1002149. doi:10/f9b29f  
39  
40 28 37 Vyas A, Creswell J, Codlin AJ, *et al.* Community-based active case-finding to reach the  
41 29 most vulnerable: tuberculosis in tribal areas of India. *The International Journal of*  
42 30 *Tuberculosis and Lung Disease* 2019;**23**:750–755. doi:10.5588/ijtld.18.0741  
43  
44 31 38 Sohn H, Vyas A, Puri L, *et al.* Costs and operation management of community outreach  
45 32 program for tuberculosis in tribal populations in India. *Public Health Action* 2019;**9**:58–  
46 33 62. doi:10/gf5zst  
47  
48 34 39 Jo Y, Mirzoeva F, Chry M, *et al.* Standardized framework for evaluating costs of active  
49 35 case-finding programs: An analysis of two programs in Cambodia and Tajikistan. *PLOS*  
50 36 *ONE* 2020;**15**:e0228216. doi:10/ggxf9s  
51  
52 37 40 Cunnama L, Gomez GB, Siapka M, *et al.* A Systematic Review of Methodological  
53 38 Variation in Healthcare Provider Perspective Tuberculosis Costing Papers Conducted in  
54  
55  
56  
57  
58  
59  
60

- 1  
2  
3 1 Low- and Middle-Income Settings, Using An Intervention-Standardised Unit Cost  
4 2 Typology. *PharmacoEconomics* Published Online First: 4 May 2020. doi:10/ggxj2x  
5
- 6 3 41 Sarin E, Sooden A, Kole SK, *et al.* Identification of challenges and needs to improve  
7 4 community health workers performance: Narratives of Accredited Social Health Activists  
8 5 (ASHA) from two Indian districts. *Journal of Public Health in Developing Countries*  
9 6 2016;**2**:173–182.
- 10  
11 7 42 Abdel-All M, Angell B, Jan S, *et al.* What do community health workers want? Findings of  
12 8 a discrete choice experiment among Accredited Social Health Activists (ASHAs) in India.  
13 9 *BMJ Global Health* 2019;**4**:e001509. doi:10/gf6mbr
- 14  
15 10 43 Wahid SS, Munar W, Das S, *et al.* 'Our village is dependent on us. That's why we can't  
16 11 leave our work'. Characterizing mechanisms of motivation to perform among Accredited  
17 12 Social Health Activists (ASHA) in Bihar. *Health Policy Plan* 2020;**35**:58–66.  
18 13 doi:10/ggxqxm
- 19  
20 14 44 Bhatia K. Performance-Based Incentives of the ASHA Scheme: Stakeholders'  
21 15 Perspectives. *Economic and Political Weekly* 2014;**49**:145–51.
- 22  
23 16 45 Sarin E, Lunsford SS, Sooden A, *et al.* The Mixed Nature of Incentives for Community  
24 17 Health Workers: Lessons from a Qualitative Study in Two Districts in India. *Frontiers in*  
25 18 *Public Health* 2016;**4**. doi:10/ggxqxw
- 26  
27 19 46 Saprii L, Richards E, Kokho P, *et al.* Community health workers in rural India: analysing  
28 20 the opportunities and challenges Accredited Social Health Activists (ASHAs) face in  
29 21 realising their multiple roles. *Human Resources for Health* 2015;**13**:95. doi:10/f74dgd
- 30  
31 22 47 Shelley KD, Mpembeni R, Frumence G, *et al.* Integrating Community Health Worker  
32 23 Roles to Improve Facility Delivery Utilization in Tanzania: Evidence from an Interrupted  
33 24 Time Series Analysis. *Maternal and Child Health Journal* 2019;**23**:1327–38.  
34 25 doi:10/gf5xfh
- 35  
36 26 48 Shelley KD, Frumence G, Mpembeni R, *et al.* Can volunteer community health workers  
37 27 manage multiple roles? An interrupted time-series analysis of combined HIV and  
38 28 maternal and child health promotion in Iringa, Tanzania. *Health Policy and Planning*  
39 29 2018;**33**:1096–106. doi:10/gf5xd7
- 40  
41 30 49 Singh S, Dwivedi N, Dongre A, *et al.* Functioning and time utilisation by female multi-  
42 31 purpose health workers in South India: a time and motion study. *Human Resources for*  
43 32 *Health* 2018;**16**:64. doi:10/gf6mbt
- 44  
45 33 50 Sarin E, Lunsford SS. How female community health workers navigate work challenges  
46 34 and why there are still gaps in their performance: a look at female community health  
47 35 workers in maternal and child health in two Indian districts through a reciprocal  
48 36 determinism framework. *Human Resources for Health* 2017;**15**:44. doi:10/gbpgph
- 49  
50 37 51 Scott K, Shanker S. Tying their hands? Institutional obstacles to the success of the  
51 38 ASHA community health worker programme in rural north India. *AIDS Care*  
52 39 2010;**22**:1606–12. doi:10/cg2thv
- 53  
54  
55  
56  
57  
58  
59  
60

- 1  
2  
3 1 52 Sharma R, Webster P, Bhattacharyya S. Factors affecting the performance of  
4 2 community health workers in India: a multi-stakeholder perspective. *Global Health Action*  
5 3 2014;**7**:25352. doi:10/ggxrhw  
6  
7 4 53 Garg T, Gupta V, Sen D, *et al.* Prediagnostic loss to follow-up in an active case finding  
8 5 tuberculosis programme: a mixed-methods study from rural Bihar, India. *BMJ Open*  
9 6 2020;**10**:e033706. doi:10.1136/bmjopen-2019-033706  
10  
11 7 54 Scott K, George AS, Ved RR. Taking stock of 10 years of published research on the  
12 8 ASHA programme: examining India's national community health worker programme from  
13 9 a health systems perspective. *Health Research Policy and Systems* 2019;**17**:29.  
14 10 doi:10/gf2t58  
15  
16 11 55 Sundaram N, James R, Sreynimol U, *et al.* A strong TB programme embedded in a  
17 12 developing primary healthcare system is a lose-lose situation: insights from patient and  
18 13 community perspectives in Cambodia. *Health Policy Plan* 2017;**32**:ii32–42.  
19 14 doi:10.1093/heapol/czx079  
20  
21 15 56 Scott K, Beckham SW, Gross M, *et al.* What do we know about community-based health  
22 16 worker programs? A systematic review of existing reviews on community health workers.  
23 17 *Human Resources for Health* 2018;**16**:39. doi:10.1186/s12960-018-0304-x  
24  
25 18 57 Adejumo AO, Azuogu B, Okorie O, *et al.* Community referral for presumptive TB in  
26 19 Nigeria: a comparison of four models of active case finding. *BMC Public Health*  
27 20 2016;**16**:177. doi:10.1186/s12889-016-2769-7  
28  
29  
30 21  
31  
32  
33  
34  
35  
36  
37  
38  
39  
40  
41  
42  
43  
44  
45  
46  
47  
48  
49  
50  
51  
52  
53  
54  
55  
56  
57  
58  
59  
60

1  
2  
3 **1 LEGEND FOR FIGURES**  
4

5 **2 figure 1**

6 Map indicating the blocks in intervention and control region in Samastipur district, Bihar.  
7  
8  
9

10 **5 figure 2**

11 The diagnostic protocol used in the active case-finding project.

12 Legend: T/T: Treatment; F/U: Follow-up; EPTB: Extrapulmonary TB; DSTB: Drug-sensitive  
13 TB; DRTB: Drug-resistant TB; PLHIV: People living with HIV; CXR(?): Irrespective of the  
14  
15  
16  
17  
18  
19  
20  
21  
22  
23  
24  
25  
26  
27  
28  
29  
30  
31  
32  
33  
34  
35  
36  
37  
38  
39  
40  
41  
42  
43  
44  
45  
46  
47  
48  
49  
50  
51  
52  
53  
54  
55  
56  
57  
58  
59  
60

9 CXR result

11 **figure 3**

12 The organization chart in the active case-finding project

14 **figure 4**

15 The patient care cascade from Q3 2017 to Q2 2018

16 \* All percentages are calculated as a proportion of the number of participants entering the  
17 previous step of the cascade



1  
2  
3  
4  
5  
6  
7  
8  
9  
10  
11  
12  
13  
14  
15  
16  
17  
18  
19  
20  
21  
22  
23  
24  
25  
26  
27  
28  
29  
30  
31  
32  
33  
34  
35  
36  
37  
38  
39  
40  
41



BMJ Open Referral

Symptom screening

- a. Cough ≥ 2 weeks
- b. Blood in sputum
- c. Chest pain
- d. Fever ≥ 2 weeks
- e. Night-sweats
- f. Significant weight loss
- g. Fatigue
- h. Swollen lymph nodes

Any symptom  
Presumptive TB case

No symptom

Sputum Microscopy (AFB) and CXR

AFB(+) and CXR(?)

AFB(-)

CXR(Abnormal)

CXR(Normal)

GeneXpert

GeneXpert(+)

GeneXpert(-)

Microbiologically  
diagnosed TB

Physician  
Consultation

Clinically  
diagnosed TB

Alternate diagnosis

- a. Presumptive DRTB Patients
  - i. Failed First Line TB T/T
  - ii. Contact of DRTB
  - iii. Bac+ on F/U
  - iv. Previously treated
  - v. PLHIV
- b. Presumptive EPTB Case
- c. Paediatric Cases

Upfront  
GeneXpert

High clinical suspicion

1  
2  
3  
4  
5  
6  
7  
8  
9  
10  
11  
12  
13  
14  
15  
16  
17  
18  
19  
20  
21  
22  
23  
24  
25  
26  
27  
28  
29  
30  
31  
32  
33  
34  
35  
36  
37  
38  
39  
40  
41

1  
2  
3  
4  
5  
6  
7  
8  
9  
10  
11  
12  
13  
14  
15  
16  
17  
18  
19  
20  
21  
22  
23  
24  
25  
26  
27  
28  
29  
30  
31  
32  
33  
34  
35  
36  
37  
38  
39  
40  
41

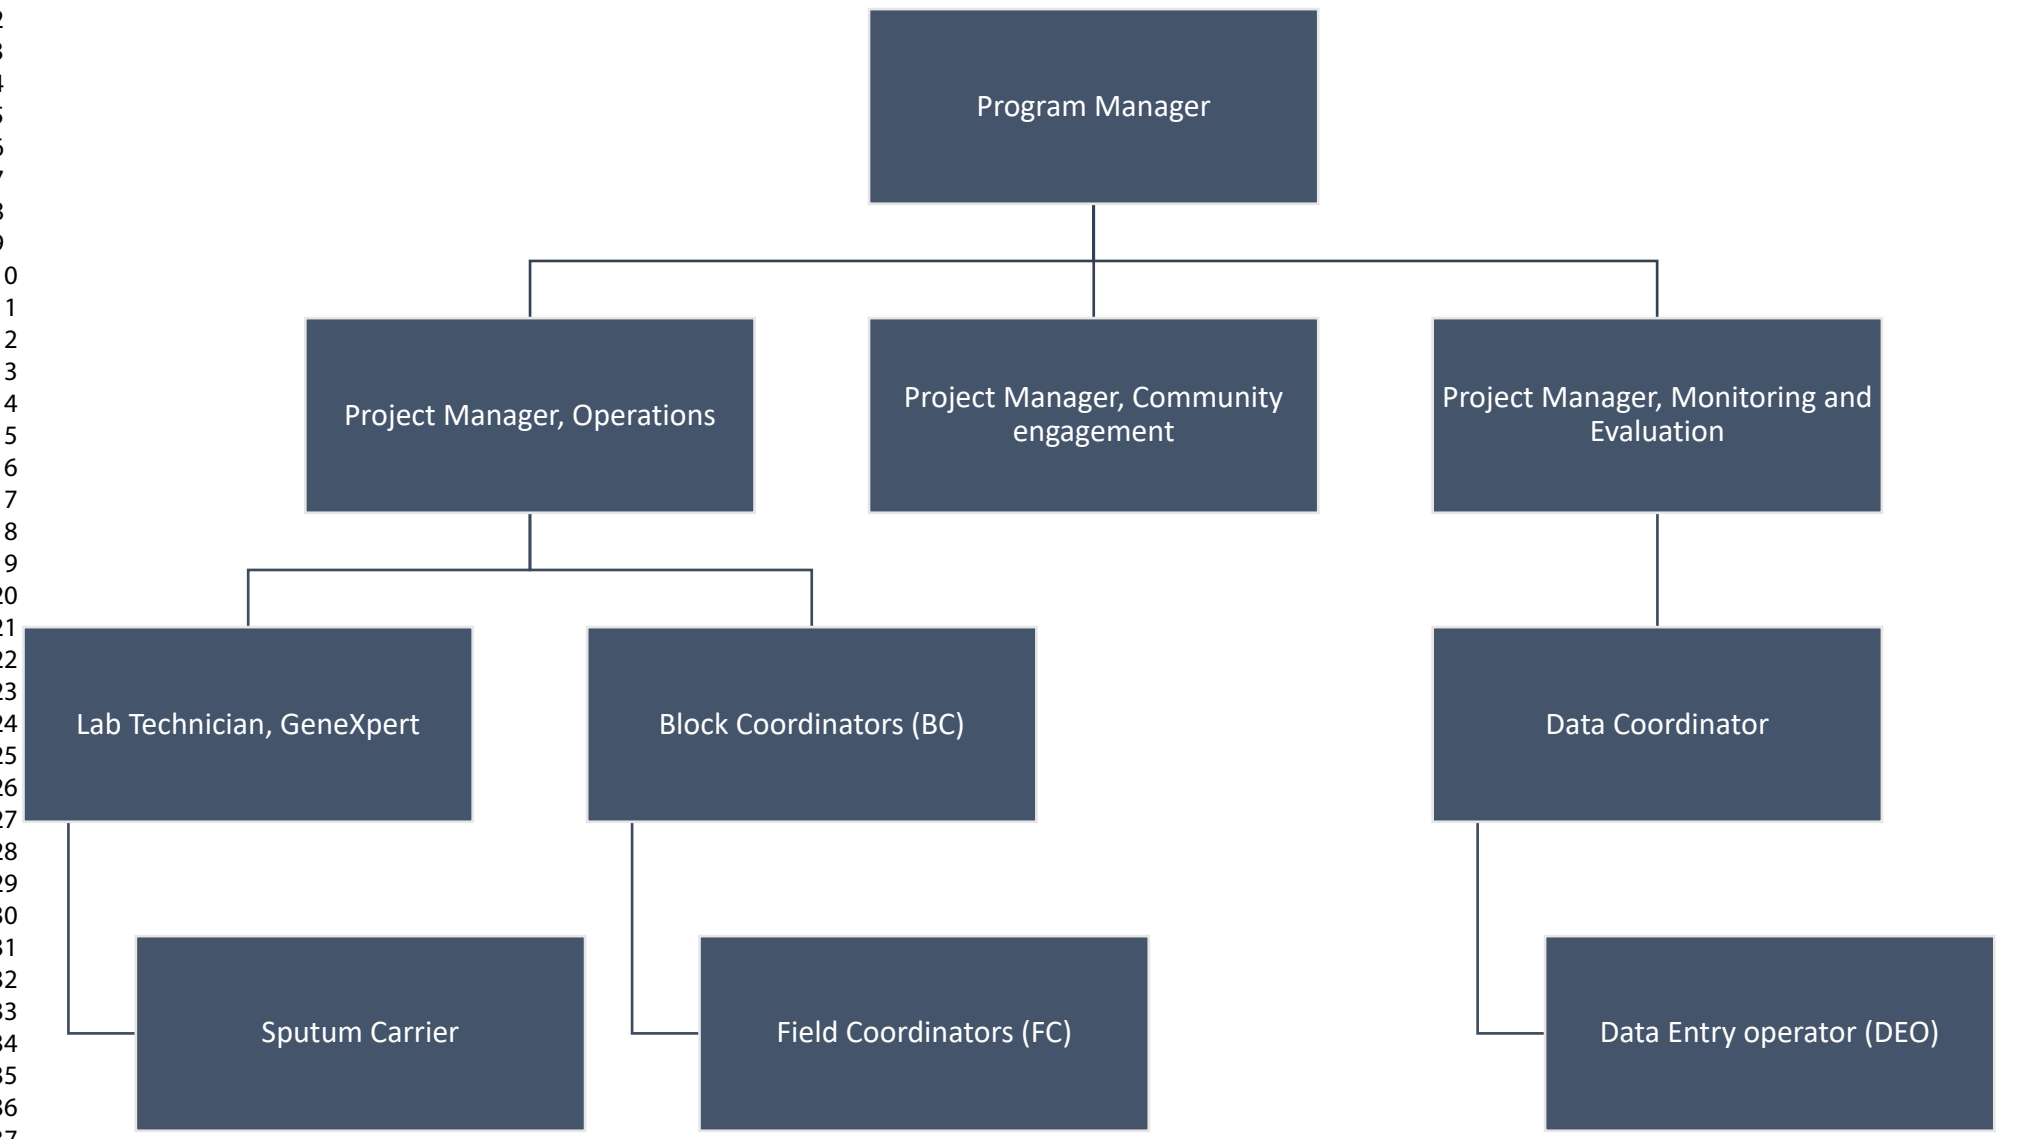

Referrals  
12,394

BMJ Open

Page 28 of 37

1  
2  
3  
4  
5  
6  
7  
8  
9  
10  
11  
12  
13  
14  
15  
16  
17  
18  
19  
20  
21  
22  
23  
24  
25  
26  
27  
28  
29  
30  
31  
32  
33  
34  
35  
36  
37  
38  
39  
40

People not screened for TB  
1161 (9%)

People with no symptoms  
1338 (12%)

Patients not tested for TB  
4031 (41%)

Patients without TB diagnosis  
4628 (79%)

TB patients not initiated on treatment  
42 (3%)

People screened for TB  
11,233 (91%)

Presumptive TB cases  
9895 (88%)

Patients tested for TB  
5864 (59%)

Patients with confirmed TB diagnosis  
1236 (21%)

TB patients initiated on treatment  
1194 (97%)

Supplementary File 1: The cost breakdown of the active case-finding program from Q3 2017 to Q2 2018 with cost allocation between case-finding and treatment support activities

| #  | Category                      | Item                                        | 2017Q3     | 2017Q4     | 2018Q1     | 2018Q2     | Total       | Comment                           | Cost allocation |           | Case-finding costs proportionate to the cost allocation |            |            |            |             |
|----|-------------------------------|---------------------------------------------|------------|------------|------------|------------|-------------|-----------------------------------|-----------------|-----------|---------------------------------------------------------|------------|------------|------------|-------------|
|    |                               |                                             |            |            |            |            |             |                                   | Case-finding    | Treatment | C2017Q3                                                 | C2017Q4    | C2018Q1    | C2018Q2    | Total       |
| 1  | Activities                    | Trainers, per-diem costs                    | ₹ 29,850   | ₹ 29,850   | ₹ 29,850   | ₹ 29,850   | ₹ 1,19,400  |                                   | 100%            | 0%        | ₹ 29,850                                                | ₹ 29,850   | ₹ 29,850   | ₹ 29,850   | ₹ 1,19,400  |
| 2  | Activities                    | Case-finding incentives                     | ₹ 1,39,500 | ₹ 1,48,000 | ₹ 1,57,000 | ₹ 1,52,500 | ₹ 5,97,000  | Unit cost INR500                  | 100%            | 0%        | ₹ 1,39,500                                              | ₹ 1,48,000 | ₹ 1,57,000 | ₹ 1,52,500 | ₹ 5,97,000  |
| 3  | Activities                    | Treatment completion incentives             | ₹ 2,65,050 | ₹ 2,81,200 | ₹ 2,98,300 | ₹ 2,89,750 | ₹ 11,34,300 | Unit cost INR1000                 | 0%              | 100%      | ₹ -                                                     | ₹ -        | ₹ -        | ₹ -        | ₹ -         |
| 4  | Activities                    | Field visits (fuel costs, management)       | ₹ 2,71,541 | ₹ 3,11,828 | ₹ 3,69,122 | ₹ 3,23,806 | ₹ 12,76,297 |                                   | 66%             | 34%       | ₹ 1,80,029                                              | ₹ 2,06,739 | ₹ 2,44,724 | ₹ 2,14,680 | ₹ 8,46,171  |
| 5  | Activities                    | Training and workshops                      | ₹ 65,395   | ₹ 52,488   | ₹ 58,690   | ₹ 2,69,343 | ₹ 4,45,916  |                                   | 55%             | 45%       | ₹ 35,925                                                | ₹ 28,835   | ₹ 32,242   | ₹ 1,47,965 | ₹ 2,44,967  |
| 6  | Activities                    | Transport allowance                         | ₹ 24,059   | ₹ 73,053   | ₹ 1,06,012 | ₹ 1,04,381 | ₹ 3,07,505  |                                   | 100%            | 0%        | ₹ 24,059                                                | ₹ 73,053   | ₹ 1,06,012 | ₹ 1,04,381 | ₹ 3,07,505  |
| 7  | Activities                    | Communication material                      | ₹ 24,474   | ₹ 15,400   | ₹ 50,265   | ₹ 16,950   | ₹ 1,07,089  |                                   | 100%            | 0%        | ₹ 24,474                                                | ₹ 15,400   | ₹ 50,265   | ₹ 16,950   | ₹ 1,07,089  |
| 8  | Administrative overheads      | Information technology (mobile data, voice) | ₹ 25,020   | ₹ 25,638   | ₹ 16,969   | ₹ 13,150   | ₹ 80,777    |                                   | 66%             | 34%       | ₹ 16,588                                                | ₹ 16,998   | ₹ 11,250   | ₹ 8,718    | ₹ 53,554    |
| 9  | Administrative overheads      | Car rental (per month)                      | ₹ 1,50,000 | ₹ 1,50,000 | ₹ 1,50,000 | ₹ 1,50,000 | ₹ 6,00,000  |                                   | 81%             | 19%       | ₹ 1,21,835                                              | ₹ 1,21,835 | ₹ 1,21,835 | ₹ 1,21,835 | ₹ 4,87,339  |
| 10 | Administrative overheads      | Rent                                        | ₹ 43,900   | ₹ 51,900   | ₹ 51,900   | ₹ 51,900   | ₹ 1,99,600  |                                   | 81%             | 19%       | ₹ 35,657                                                | ₹ 42,155   | ₹ 42,155   | ₹ 42,155   | ₹ 1,62,121  |
| 11 | Administrative overheads      | Electricity                                 | ₹ 4,085    | ₹ 8,055    | ₹ 7,740    | ₹ 7,654    | ₹ 27,534    |                                   | 81%             | 19%       | ₹ 3,318                                                 | ₹ 6,543    | ₹ 6,287    | ₹ 6,217    | ₹ 22,364    |
| 12 | Administrative overheads      | Supplies (stationery, workshops, etc.)      | ₹ 1,93,094 | ₹ 1,10,390 | ₹ 88,210   | ₹ 78,000   | ₹ 4,69,694  |                                   | 81%             | 19%       | ₹ 1,56,837                                              | ₹ 89,662   | ₹ 71,647   | ₹ 63,354   | ₹ 3,81,500  |
| 13 | Human resources               | Program manager                             | ₹ 2,10,000 | ₹ 2,10,000 | ₹ 2,10,000 | ₹ 2,10,000 | ₹ 8,40,000  |                                   | 81%             | 19%       | ₹ 1,70,569                                              | ₹ 1,70,569 | ₹ 1,70,569 | ₹ 1,70,569 | ₹ 6,82,275  |
| 14 | Human resources               | Project manager (community and training)    | ₹ 1,35,000 | ₹ 1,35,000 | ₹ 1,35,000 | ₹ 2,03,226 | ₹ 6,08,226  |                                   | 81%             | 19%       | ₹ 1,09,651                                              | ₹ 1,09,651 | ₹ 1,09,651 | ₹ 1,65,067 | ₹ 4,94,020  |
| 15 | Human resources               | Project manager (service delivery)          | ₹ 2,10,484 | ₹ 2,70,000 | ₹ 1,46,613 | ₹ 1,35,000 | ₹ 7,62,097  |                                   | 81%             | 19%       | ₹ 1,70,962                                              | ₹ 2,19,303 | ₹ 1,19,084 | ₹ 1,09,651 | ₹ 6,18,999  |
| 16 | Human resources               | GeneXpert technician                        | ₹ 56,903   | ₹ 1,02,000 | ₹ 1,02,000 | ₹ 1,02,000 | ₹ 3,62,903  |                                   | 100%            | 0%        | ₹ 56,903                                                | ₹ 1,02,000 | ₹ 1,02,000 | ₹ 1,02,000 | ₹ 3,62,903  |
| 17 | Human resources               | MIS operator                                | ₹ 49,484   | ₹ 90,250   | ₹ 1,01,000 | ₹ 1,16,250 | ₹ 3,56,984  |                                   | 66%             | 34%       | ₹ 32,807                                                | ₹ 59,835   | ₹ 66,962   | ₹ 77,073   | ₹ 2,36,677  |
| 18 | Human resources               | Consultants                                 | ₹ 1,66,833 | ₹ 1,65,000 | ₹ -        | ₹ -        | ₹ 3,31,833  |                                   | 100%            | 0%        | ₹ 1,66,833                                              | ₹ 1,65,000 | ₹ -        | ₹ -        | ₹ 3,31,833  |
| 19 | Human resources               | Block coordinators (BCs)                    | ₹ 1,92,000 | ₹ 1,92,000 | ₹ 1,92,000 | ₹ 1,92,000 | ₹ 7,68,000  |                                   | 62%             | 38%       | ₹ 1,19,897                                              | ₹ 1,19,897 | ₹ 1,19,897 | ₹ 1,19,897 | ₹ 4,79,588  |
| 20 | Human resources               | Field coordinators (FCs)                    | ₹ 4,11,196 | ₹ 4,02,155 | ₹ 4,48,906 | ₹ 4,59,767 | ₹ 17,22,024 |                                   | 55%             | 45%       | ₹ 2,25,893                                              | ₹ 2,20,926 | ₹ 2,46,609 | ₹ 2,52,576 | ₹ 9,46,005  |
| 21 | Procurement of medical items  | GeneXpert, test cartridge                   | ₹ 1,29,006 | ₹ 6,26,923 | ₹ 6,20,888 | ₹ 3,39,489 | ₹ 17,16,306 | Unit cost USD11.26                | 100%            | 0%        | ₹ 1,29,006                                              | ₹ 6,26,923 | ₹ 6,20,888 | ₹ 3,39,489 | ₹ 17,16,306 |
| 22 | Procurement of medical items  | Contingency, drugs                          | ₹ 38,127   | ₹ 98,864   | ₹ 1,28,695 | ₹ 1,65,859 | ₹ 4,31,545  |                                   | 0%              | 100%      | ₹ -                                                     | ₹ -        | ₹ -        | ₹ -        | ₹ -         |
| 23 | Procurement of medical items  | Contingency, chest X-rays                   | ₹ 1,32,823 | ₹ 2,57,945 | ₹ 3,39,280 | ₹ 2,11,545 | ₹ 9,41,593  |                                   | 100%            | 0%        | ₹ 1,32,823                                              | ₹ 2,57,945 | ₹ 3,39,280 | ₹ 2,11,545 | ₹ 9,41,593  |
| 24 | Procurement of medical items  | Contingency, sputum microscopy              | ₹ 11,280   | ₹ 3,980    | ₹ 13,400   | ₹ 9,200    | ₹ 37,860    |                                   | 100%            | 0%        | ₹ 11,280                                                | ₹ 3,980    | ₹ 13,400   | ₹ 9,200    | ₹ 37,860    |
| 25 | Procurement of medical items  | Extra-pulmonary TB diagnostics              | ₹ 10,986   | ₹ 33,907   | ₹ 73,800   | ₹ 69,324   | ₹ 1,88,017  |                                   | 100%            | 0%        | ₹ 10,986                                                | ₹ 33,907   | ₹ 73,800   | ₹ 69,324   | ₹ 1,88,017  |
| 26 | Procurement of medical items  | Complications and hospitalization           | ₹ 25,719   | ₹ 45,597   | ₹ 42,386   | ₹ 36,111   | ₹ 1,49,813  |                                   | 0%              | 100%      | ₹ -                                                     | ₹ -        | ₹ -        | ₹ -        | ₹ -         |
| 27 | Procurement of medical items  | Sputum containers (for transport)           | ₹ 8,894    | ₹ -        | ₹ -        | ₹ -        | ₹ 8,894     |                                   | 100%            | 0%        | ₹ 8,894                                                 | ₹ -        | ₹ -        | ₹ -        | ₹ 8,894     |
| 28 | Procurement of medical items  | Customs duty and Xpert shipping             | ₹ 53,694   | ₹ 2,60,934 | ₹ 2,58,422 | ₹ 1,41,300 | ₹ 7,14,350  | Unit cost INR314                  | 100%            | 0%        | ₹ 53,694                                                | ₹ 2,60,934 | ₹ 2,58,422 | ₹ 1,41,300 | ₹ 7,14,350  |
| 29 | <i>Additional information</i> |                                             |            |            |            |            |             |                                   |                 |           |                                                         |            |            |            |             |
| 30 |                               | Cartridges used                             | 171        | 831        | 823        | 450        |             |                                   |                 |           |                                                         |            |            |            |             |
| 31 |                               | Total TB diagnosed                          | 284        | 302        | 324        | 326        |             |                                   |                 |           |                                                         |            |            |            |             |
| 32 |                               | Total TB treatments started                 | 279        | 296        | 314        | 305        |             | See patient cascade in the figure |                 |           |                                                         |            |            |            |             |
| 33 |                               | Total treatment completed                   | 265        | 281        | 298        | 290        |             | Assumed at 95%                    |                 |           |                                                         |            |            |            |             |

\* All cost figures are reported in Indian Rupee (INR or ₹)

\* The cost allocation is sourced from the time calculations in Supplementary File 2

\* The case-finding incentive (item 2) is derived from total cases diagnosed (item 31)

\* The treatment completion incentive (item 3) is derived from total treatment completed (item 33)

\* The GeneXpert costs (item 21 and 28) are derived from the actual consumption of the cartridges (item 30)

## Supplementary File 2: The time allocation of human resource between case-finding and treatment support activities

Table A: Detailed time allocation for human resource

| #   | Human Resource                | Activities                                                                            | Value | Comment                                                                                             |
|-----|-------------------------------|---------------------------------------------------------------------------------------|-------|-----------------------------------------------------------------------------------------------------|
| 1   | <b>Field coordinator (FC)</b> | Work hours (in hours)                                                                 | 48    | 6 working days, 8 hours a day; 5 day field work + 1 day reporting-review-planning-training          |
|     |                               | Total patients diagnosed per month                                                    | 105   | 100 - 110 patients diagnosed per month                                                              |
|     |                               | Average treatment duration per patient (in months)                                    | 7     | DSTB treatment duration of 6 - 8 months                                                             |
|     |                               | Patients per field coordinator, steady state                                          | 35    | 18 field coordinators in the program                                                                |
|     |                               | Travel per week (in hours)                                                            | 193   | 4 weeks in a month. Average travel reimbursement per field coordinator of ₹2700 at ₹3.5 per km.     |
| 1.1 |                               | <b>Travel time per week (in hours)</b>                                                | 10    | Average speed of 20 kmph                                                                            |
| 1.2 |                               | <b>Treatment support activities</b>                                                   |       |                                                                                                     |
|     |                               | Time per visit (in hours)                                                             | 1     | Half hour on average                                                                                |
|     |                               | Number of visits per patient in a month                                               | 3     | 3 times a month                                                                                     |
|     |                               | Total time spent per week in treatment support activities (in hours)                  | 13    |                                                                                                     |
| 1.3 |                               | <b>Case-finding activities</b>                                                        |       |                                                                                                     |
|     |                               | Time spent in ASHA (CHW) training per week (in hours)                                 | 2     | Average 1 meeting per week lasting nearly 2 hour                                                    |
|     |                               | Time spent in meeting individual ASHAs per week (in hours)                            | 2     | 4 ASHAs per week, 0.5 hour per meeting                                                              |
|     |                               | Time spent in hospital visits and assisting in diagnosis per week (in hours)          | 6     | 3 times a week, 2 hours per visit                                                                   |
|     |                               | Time spent in meeting referrals and screening per week (in hours)                     | 6     | 12 per week, 0.5 hour per visit                                                                     |
|     |                               | Total time spent per week in case-finding activities (in hours)                       | 16    |                                                                                                     |
| 1.4 |                               | <b>Reporting-review-planning-training, time spent per week (in hours)</b>             | 8     | 1 day                                                                                               |
| 2   | <b>Block coordinator (BC)</b> | Work hours (in hours)                                                                 | 48    | 6 working days, 8 hours a day                                                                       |
| 2.1 |                               | Admin-reporting-review-planning, time spent per week (in hours)                       | 8     | 1 complete day, focused around FCs in their area                                                    |
| 2.2 |                               | Block review-data management-project meeting-training, time spent per week (in hours) | 8     | Project meeting once a week, data management with MIS team, reviewing project performance, training |
| 2.3 |                               | Supervisory work, time spent per week (in hours)                                      | 32    | Split in proportion to FCs time spent in activities                                                 |
| 3   | <b>Managers</b>               | Work hours                                                                            | 48    | 6 working days, 8 hours a day                                                                       |
| 3.1 |                               | Review-planning-design, time spent per week (in hours)                                | 24    | 3 days a week, largely centered around case-finding                                                 |
| 3.2 |                               | Supervisory work, time spent per week (in hours)                                      | 24    | Split in proportion to BCs time spent in activities                                                 |
| 4   | <b>Data management team</b>   | Work hours                                                                            | 48    | Split in proportion of FCs time under reporting-review-planning                                     |

Table B: Summary of time allocation between case-finding and treatment support activities

| Field coordinator (FC) | Activity                     | Time | Travel | Reporting-review-planning-training | Total | Proportion |
|------------------------|------------------------------|------|--------|------------------------------------|-------|------------|
| 1                      | Case-finding activities      | 16.0 | 5.3    | 4.4                                | 25.7  | 55%        |
| 2                      | Treatment support activities | 13.1 | 4.3    | 3.6                                | 21.1  | 45%        |

Note: Time spent in travel and reporting-review-planning-training is proportionate to time spent in respective case-finding and treatment activities.

| Block coordinator (BC) | Activity                     | Admin-reporting-review-planning | Block review-data management-project meeting-training | Supervisory work, time spent per week | Proportion |
|------------------------|------------------------------|---------------------------------|-------------------------------------------------------|---------------------------------------|------------|
| 1                      | Case-finding activities      | 4.4                             | 8.0                                                   | 17.6                                  | 62%        |
| 2                      | Treatment support activities | 3.6                             | 0.0                                                   | 14.4                                  | 38%        |

| Managers | Activity                     | Review-planning-design | Supervisory work | Proportion |
|----------|------------------------------|------------------------|------------------|------------|
| 1        | Case-finding activities      | 24                     | 15.0             | 81%        |
| 2        | Treatment support activities | 0                      | 9.0              | 19%        |

| Data management team | Activity                     | Time | Proportion |
|----------------------|------------------------------|------|------------|
| 1                    | Case-finding activities      | 94.7 | 66%        |
| 2                    | Treatment support activities | 48.1 | 34%        |

Table C: Proportion of time allocation for human resource

| # | Human Resource         | Case-finding | Treatment support |
|---|------------------------|--------------|-------------------|
| 1 | Field coordinator (FC) | 55%          | 45%               |
| 2 | Block coordinator (BC) | 62%          | 38%               |
| 3 | Managers               | 81%          | 19%               |
| 4 | Data management team   | 66%          | 34%               |

## Supplementary File 3: Additional information on ASHA

Table A: Number of ASHAs

| # | Block      | Number of ASHA <sup>^</sup> | Population | ASHAs per 1000 pop. |
|---|------------|-----------------------------|------------|---------------------|
| 1 | Ujiarpur   | 264                         | 341906     | 0.77                |
| 2 | Saraianjan | 236                         | 287760     | 0.82                |
| 3 | Bibhutipur | 293                         | 391817     | 0.75                |
|   | Total      | 793                         | 1021483    | 0.78                |

Note: <sup>^</sup>Data as of December 2017.

Table B: Work of FC and ASHAs

| Indicator         | Steady state | Maximum |
|-------------------|--------------|---------|
| Total FC          | 18           | 23      |
| Pop. per FC       | 56749        | 44412   |
| ASHA per FC       | 44           | 34      |
| Intervention pop. | 1021483      |         |

Note:

1. FC is Field Coordinator
2. Steady state indicates matured program operations and maximum indicate their highest value during study period.



Table C1: ASHA's performance on reproductive, maternal, and child health program indicators in Samastipur, Bihar

| Indicator                                                           | Region | Baseline period |        |        |        | Implementation period |        |        |        | Quarterly average |                |
|---------------------------------------------------------------------|--------|-----------------|--------|--------|--------|-----------------------|--------|--------|--------|-------------------|----------------|
|                                                                     |        | 2016Q3          | 2016Q4 | 2017Q1 | 2017Q2 | 2017Q3                | 2017Q4 | 2018Q1 | 2018Q2 | Baseline          | Implementation |
| Total number of pregnant women registered for ANC                   | IR     | 5947            | 5137   | 6330   | 6229   | 6415                  | 5895   | 6593   | 6178   | 5911              | 6270           |
|                                                                     | CR     | 5951            | 5333   | 6340   | 6769   | 6387                  | 6083   | 6648   | 6190   | 6098              | 6327           |
| Number of Institutional Deliveries conducted (Including C-Sections) | IR     | 4592            | 4116   | 3913   | 3225   | 5011                  | 4419   | 3694   | 3134   | 3962              | 4065           |
|                                                                     | CR     | 4045            | 3646   | 3809   | 2739   | 4482                  | 4015   | 3487   | 2631   | 3560              | 3654           |
| Number of Immunisation sessions where ASHAs were present            | IR     | 2528            | 2531   | 2535   | 2606   | 2528                  | 2550   | 2574   | 2566   | 2550              | 2555           |
|                                                                     | CR     | 2743            | 2728   | 2719   | 2673   | 2583                  | 2626   | 2674   | 2672   | 2716              | 2639           |

Table C2: Detailed disaggregation of data in Table C1

| Indicator                                                           | Region | Baseline period |        |        |        | Implementation period |        |        |        | Block       |
|---------------------------------------------------------------------|--------|-----------------|--------|--------|--------|-----------------------|--------|--------|--------|-------------|
|                                                                     |        | 2016Q3          | 2016Q4 | 2017Q1 | 2017Q2 | 2017Q3                | 2017Q4 | 2018Q1 | 2018Q2 |             |
| Total number of pregnant women registered for ANC                   | IR     | 2312            | 1788   | 2376   | 2278   | 2323                  | 1832   | 2267   | 2296   | Bibhutipur  |
|                                                                     | IR     | 1562            | 1510   | 1858   | 1980   | 1959                  | 1899   | 2169   | 1993   | Sarairanjan |
|                                                                     | IR     | 2073            | 1839   | 2096   | 1971   | 2133                  | 2164   | 2157   | 1889   | Ujiarpur    |
|                                                                     | CR     | 2157            | 1837   | 2461   | 2413   | 2278                  | 2040   | 2477   | 2095   | Kalyanpur   |
|                                                                     | CR     | 802             | 659    | 904    | 792    | 929                   | 891    | 911    | 804    | Pusa        |
|                                                                     | CR     | 1433            | 1220   | 1341   | 1714   | 1645                  | 1761   | 1512   | 1552   | Singhia     |
| Number of Institutional Deliveries conducted (Including C-Sections) | CR     | 1559            | 1617   | 1634   | 1850   | 1535                  | 1391   | 1748   | 1739   | Warisnagar  |
|                                                                     | IR     | 1562            | 1501   | 1396   | 1125   | 1710                  | 1531   | 1354   | 1180   | Bibhutipur  |
|                                                                     | IR     | 1676            | 1458   | 1392   | 1157   | 1827                  | 1605   | 1326   | 1063   | Sarairanjan |
|                                                                     | IR     | 1354            | 1157   | 1125   | 943    | 1474                  | 1283   | 1014   | 891    | Ujiarpur    |
|                                                                     | CR     | 1059            | 931    | 1093   | 725    | 1160                  | 867    | 938    | 801    | Kalyanpur   |
|                                                                     | CR     | 816             | 675    | 661    | 546    | 833                   | 716    | 630    | 502    | Pusa        |
| Number of Immunisation sessions where ASHAs were present            | CR     | 995             | 995    | 1033   | 671    | 1186                  | 1264   | 986    | 639    | Singhia     |
|                                                                     | CR     | 1175            | 1045   | 1022   | 797    | 1303                  | 1168   | 933    | 689    | Warisnagar  |
|                                                                     | IR     | 923             | 909    | 915    | 933    | 931                   | 907    | 927    | 928    | Bibhutipur  |
|                                                                     | IR     | 736             | 765    | 763    | 800    | 768                   | 767    | 772    | 773    | Sarairanjan |
|                                                                     | IR     | 869             | 857    | 857    | 873    | 829                   | 876    | 875    | 865    | Ujiarpur    |
|                                                                     | CR     | 995             | 956    | 976    | 982    | 969                   | 964    | 980    | 971    | Kalyanpur   |
|                                                                     | CR     | 424             | 445    | 412    | 388    | 363                   | 363    | 373    | 378    | Pusa        |
|                                                                     | CR     | 606             | 622    | 628    | 631    | 588                   | 617    | 615    | 614    | Singhia     |
|                                                                     | CR     | 718             | 705    | 703    | 672    | 663                   | 682    | 706    | 709    | Warisnagar  |

32 Note:

33 1. This is the dataset used for Table 3 in the manuscript.

34 2. Baseline period: Q3 of 2016 to Q2 of 2017

35 3. Study period: Q3 of 2017 to Q2 of 2018

36 4. IR: Intervention region

37 5. CR: Control region

38 6. ASHA: Accredited Social Health Activist

39 7. ANC: Antenatal checkup

40

41

42

43

44

45

46

## Supplementary File 4: The disaggregated yield of the active case-finding program from Q3 2017 to Q2 2018.

Table A: Summary of yield by various blocks

| #  | Indicator                                       | Total | Bibhutipur | Sarairanjan | Ujiarpur |
|----|-------------------------------------------------|-------|------------|-------------|----------|
| 1  | # of people eligible for screening (referrals)  | 12394 | 4702       | 3764        | 3928     |
| 2  | # of people screened                            | 11233 | 4175       | 3403        | 3655     |
| 3  | # of people with TB symptoms                    | 9895  | 3573       | 3066        | 3256     |
| 4  | # of people tested/evaluated for TB             | 5864  | 2062       | 1870        | 1932     |
| 5  | # of people diagnosed with TB                   | 1236  | 439        | 461         | 336      |
| 6  | # of people initiated on treatment              | 1194  | 427        | 437         | 330      |
| 7  | # of people diagnosed with TB (Bac+)            | 637   | 167        | 253         | 217      |
| 8  | Proportion of microbiologically diagnosed cases | 52%   | 38%        | 55%         | 65%      |
| 9  | Pre-diagnostic loss to follow-up                | 41%   | 42%        | 39%         | 41%      |
| 10 | Pre-treatment loss to follow-up                 | 3%    | 3%         | 5%          | 2%       |
| 11 | % screened of referred                          | 91%   | 89%        | 90%         | 93%      |
| 12 | % presumptive of screened                       | 88%   | 86%        | 90%         | 89%      |
| 13 | % tested of presumptive                         | 59%   | 58%        | 61%         | 59%      |
| 14 | % diagnosed with TB of tested                   | 21%   | 21%        | 25%         | 17%      |

Note: Bac+ means microbiologically-confirmed TB.

Table B: Details of yield by various blocks and quarters

| #  | Indicator                                       | Bibhutipur |       |       |       | Sarairanjan |       |       |      | Ujiarpur |       |       |       | Overall |      |      |      |
|----|-------------------------------------------------|------------|-------|-------|-------|-------------|-------|-------|------|----------|-------|-------|-------|---------|------|------|------|
|    |                                                 | B17Q3      | B17Q4 | B18Q1 | B18Q2 | S17Q3       | S17Q4 | S18Q1 | S8Q2 | U17Q3    | U17Q4 | U18Q1 | U18Q2 | 17Q3    | 17Q4 | 18Q1 | 18Q2 |
| 1  | # of people eligible for screening (referrals)  | 830        | 1320  | 1513  | 1039  | 794         | 781   | 988   | 1201 | 678      | 1080  | 1126  | 1044  | 2302    | 3181 | 3627 | 3284 |
| 2  | # of people screened                            | 698        | 1135  | 1420  | 922   | 648         | 737   | 933   | 1085 | 618      | 974   | 1078  | 985   | 1964    | 2846 | 3431 | 2992 |
| 3  | # of people with TB symptoms                    | 495        | 983   | 1273  | 822   | 593         | 662   | 870   | 941  | 502      | 894   | 983   | 877   | 1590    | 2539 | 3126 | 2640 |
| 4  | # of people tested/evaluated for TB             | 251        | 566   | 762   | 483   | 334         | 383   | 574   | 579  | 276      | 519   | 597   | 540   | 861     | 1468 | 1933 | 1602 |
| 5  | # of people diagnosed with TB                   | 83         | 102   | 136   | 118   | 121         | 114   | 114   | 112  | 80       | 86    | 74    | 96    | 284     | 302  | 324  | 326  |
| 6  | # of people initiated on treatment              | 83         | 100   | 132   | 112   | 117         | 111   | 109   | 100  | 79       | 85    | 73    | 93    | 279     | 296  | 314  | 305  |
| 7  | # of people diagnosed with TB (Bac+)            | 32         | 45    | 53    | 37    | 50          | 51    | 78    | 74   | 55       | 48    | 53    | 61    | 137     | 144  | 184  | 172  |
| 8  | Proportion of microbiologically diagnosed cases | 39%        | 44%   | 39%   | 31%   | 41%         | 45%   | 68%   | 66%  | 69%      | 56%   | 72%   | 64%   | 48%     | 48%  | 57%  | 53%  |
| 9  | Pre-diagnostic loss to follow-up                | 49%        | 42%   | 40%   | 41%   | 44%         | 42%   | 34%   | 38%  | 45%      | 42%   | 39%   | 38%   | 46%     | 42%  | 38%  | 39%  |
| 10 | Pre-treatment loss to follow-up                 | 0%         | 2%    | 3%    | 5%    | 3%          | 3%    | 4%    | 11%  | 1%       | 1%    | 1%    | 3%    | 2%      | 2%   | 3%   | 6%   |
| 11 | % screened of referred                          | 84%        | 86%   | 94%   | 89%   | 82%         | 94%   | 94%   | 90%  | 91%      | 90%   | 96%   | 94%   | 85%     | 89%  | 95%  | 91%  |
| 12 | % presumptive of screened                       | 71%        | 87%   | 90%   | 89%   | 92%         | 90%   | 93%   | 87%  | 81%      | 92%   | 91%   | 89%   | 81%     | 89%  | 91%  | 88%  |
| 13 | % tested of presumptive                         | 51%        | 58%   | 60%   | 59%   | 56%         | 58%   | 66%   | 62%  | 55%      | 58%   | 61%   | 62%   | 54%     | 58%  | 62%  | 61%  |
| 14 | % diagnosed with TB of tested                   | 33%        | 18%   | 18%   | 24%   | 36%         | 30%   | 20%   | 19%  | 29%      | 17%   | 12%   | 18%   | 33%     | 21%  | 17%  | 20%  |
|    |                                                 | Bibhutipur |       |       |       | Sarairanjan |       |       |      | Ujiarpur |       |       |       | Overall |      |      |      |

Note:

- 1. B: Bibhutipur
- 2. S: Sarairanjan
- 3. U: Ujiarpur

**CHEERS Checklist**

**Items to include when reporting economic evaluations of health interventions**

The **ISPOR CHEERS Task Force Report**, *Consolidated Health Economic Evaluation Reporting Standards (CHEERS)—Explanation and Elaboration: A Report of the ISPOR Health Economic Evaluations Publication Guidelines Good Reporting Practices Task Force*, provides examples and further discussion of the 24-item CHEERS Checklist and the CHEERS Statement. It may be accessed via the *Value in Health* or via the ISPOR Health Economic Evaluation Publication Guidelines – CHEERS: Good Reporting Practices webpage: <http://www.ispor.org/TaskForces/EconomicPubGuidelines.asp>

| Section/item                    | Item No | Recommendation                                                                                                                                                                             | Reported on page No/line No |
|---------------------------------|---------|--------------------------------------------------------------------------------------------------------------------------------------------------------------------------------------------|-----------------------------|
| <b>Title and abstract</b>       |         |                                                                                                                                                                                            |                             |
| Title                           | 1       | Identify the study as an economic evaluation or use more specific terms such as “cost-effectiveness analysis”, and describe the interventions compared.                                    | 1                           |
| Abstract                        | 2       | Provide a structured summary of objectives, perspective, setting, methods (including study design and inputs), results (including base case and uncertainty analyses), and conclusions.    | 2                           |
| <b>Introduction</b>             |         |                                                                                                                                                                                            |                             |
| Background and objectives       | 3       | Provide an explicit statement of the broader context for the study.                                                                                                                        |                             |
|                                 |         | Present the study question and its relevance for health policy or practice decisions.                                                                                                      | 4                           |
| <b>Methods</b>                  |         |                                                                                                                                                                                            |                             |
| Target population and subgroups | 4       | Describe characteristics of the base case population and subgroups analysed, including why they were chosen.                                                                               | 5                           |
| Setting and location            | 5       | State relevant aspects of the system(s) in which the decision(s) need(s) to be made.                                                                                                       | 5                           |
| Study perspective               | 6       | Describe the perspective of the study and relate this to the costs being evaluated.                                                                                                        | 7                           |
| Comparators                     | 7       | Describe the interventions or strategies being compared and state why they were chosen.                                                                                                    | 5 5                         |
| Time horizon                    | 8       | State the time horizon(s) over which costs and consequences are being evaluated and say why appropriate.                                                                                   | 4                           |
| Discount rate                   | 9       | Report the choice of discount rate(s) used for costs and outcomes and say why appropriate.                                                                                                 | Not applicable              |
| Choice of health outcomes       | 10      | Describe what outcomes were used as the measure(s) of benefit in the evaluation and their relevance for the type of analysis performed.                                                    | 7, 8                        |
| Measurement of effectiveness    | 11a     | <i>Single study-based estimates:</i> Describe fully the design features of the single effectiveness study and why the single study was a sufficient source of clinical effectiveness data. | Not applicable              |

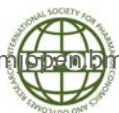

|    |                         |     |                                                                       |                |
|----|-------------------------|-----|-----------------------------------------------------------------------|----------------|
| 1  |                         | 11b | <i>Synthesis-based estimates:</i> Describe fully the methods used for |                |
| 2  |                         |     | identification of included studies and synthesis of clinical          |                |
| 3  |                         |     | effectiveness data.                                                   | Not applicable |
| 4  | Measurement and         | 12  | If applicable, describe the population and methods used to            |                |
| 5  | valuation of preference |     | elicit preferences for outcomes.                                      | Not applicable |
| 6  | based outcomes          |     |                                                                       |                |
| 7  | Estimating resources    | 13a | <i>Single study-based economic evaluation:</i> Describe approaches    |                |
| 8  | and costs               |     | used to estimate resource use associated with the alternative         |                |
| 9  |                         |     | interventions. Describe primary or secondary research methods         |                |
| 10 |                         |     | for valuing each resource item in terms of its unit cost.             |                |
| 11 |                         |     | Describe any adjustments made to approximate to opportunity           | 8              |
| 12 |                         |     | costs.                                                                |                |
| 13 |                         | 13b | <i>Model-based economic evaluation:</i> Describe approaches and       |                |
| 14 |                         |     | data sources used to estimate resource use associated with            |                |
| 15 |                         |     | model health states. Describe primary or secondary research           |                |
| 16 |                         |     | methods for valuing each resource item in terms of its unit           |                |
| 17 |                         |     | cost. Describe any adjustments made to approximate to                 |                |
| 18 |                         |     | opportunity costs.                                                    | Not applicable |
| 19 | Currency, price date,   | 14  | Report the dates of the estimated resource quantities and unit        |                |
| 20 | and conversion          |     | costs. Describe methods for adjusting estimated unit costs to         |                |
| 21 |                         |     | the year of reported costs if necessary. Describe methods for         |                |
| 22 |                         |     | converting costs into a common currency base and the                  | 9, 11          |
| 23 |                         |     | exchange rate.                                                        |                |
| 24 | Choice of model         | 15  | Describe and give reasons for the specific type of decision-          |                |
| 25 |                         |     | analytical model used. Providing a figure to show model               |                |
| 26 |                         |     | structure is strongly recommended.                                    | Not applicable |
| 27 | Assumptions             | 16  | Describe all structural or other assumptions underpinning the         |                |
| 28 |                         |     | decision-analytical model.                                            | Not applicable |
| 29 | Analytical methods      | 17  | Describe all analytical methods supporting the evaluation. This       |                |
| 30 |                         |     | could include methods for dealing with skewed, missing, or            |                |
| 31 |                         |     | censored data; extrapolation methods; methods for pooling             |                |
| 32 |                         |     | data; approaches to validate or make adjustments (such as half        |                |
| 33 |                         |     | cycle corrections) to a model; and methods for handling               |                |
| 34 |                         |     | population heterogeneity and uncertainty.                             | 8, 9           |
| 35 |                         |     |                                                                       |                |
| 36 | <b>Results</b>          |     |                                                                       |                |
| 37 | Study parameters        | 18  | Report the values, ranges, references, and, if used, probability      |                |
| 38 |                         |     | distributions for all parameters. Report reasons or sources for       |                |
| 39 |                         |     | distributions used to represent uncertainty where appropriate.        |                |
| 40 |                         |     | Providing a table to show the input values is strongly                | 10             |
| 41 |                         |     | recommended.                                                          |                |
| 42 | Incremental costs and   | 19  | For each intervention, report mean values for the main                |                |
| 43 | outcomes                |     | categories of estimated costs and outcomes of interest, as well       |                |
| 44 |                         |     | as mean differences between the comparator groups. If                 |                |
| 45 |                         |     | applicable, report incremental cost-effectiveness ratios.             | Not applicable |
| 46 | Characterising          | 20a | <i>Single study-based economic evaluation:</i> Describe the effects   |                |
| 47 | uncertainty             |     | of sampling uncertainty for the estimated incremental cost and        |                |
| 48 |                         |     | incremental effectiveness parameters, together with the impact        | Not applicable |
| 49 |                         |     |                                                                       |                |
| 50 |                         |     |                                                                       |                |
| 51 |                         |     |                                                                       |                |
| 52 |                         |     |                                                                       |                |
| 53 |                         |     |                                                                       |                |
| 54 |                         |     |                                                                       |                |
| 55 |                         |     |                                                                       |                |
| 56 |                         |     |                                                                       |                |
| 57 |                         |     |                                                                       |                |
| 58 |                         |     |                                                                       |                |
| 59 |                         |     |                                                                       |                |
| 60 |                         |     |                                                                       |                |

|                                                                      |     |                                                                                                                                                                                                                                                                            |                |
|----------------------------------------------------------------------|-----|----------------------------------------------------------------------------------------------------------------------------------------------------------------------------------------------------------------------------------------------------------------------------|----------------|
|                                                                      |     | of methodological assumptions (such as discount rate, study perspective).                                                                                                                                                                                                  |                |
|                                                                      | 20b | <i>Model-based economic evaluation</i> : Describe the effects on the results of uncertainty for all input parameters, and uncertainty related to the structure of the model and assumptions.                                                                               | Not applicable |
| Characterising heterogeneity                                         | 21  | If applicable, report differences in costs, outcomes, or cost-effectiveness that can be explained by variations between subgroups of patients with different baseline characteristics or other observed variability in effects that are not reducible by more information. | Not applicable |
| <b>Discussion</b>                                                    |     |                                                                                                                                                                                                                                                                            |                |
| Study findings, limitations, generalisability, and current knowledge | 22  | Summarise key study findings and describe how they support the conclusions reached. Discuss limitations and the generalisability of the findings and how the findings fit with current knowledge.                                                                          | 12, 13         |
| <b>Other</b>                                                         |     |                                                                                                                                                                                                                                                                            |                |
| Source of funding                                                    | 23  | Describe how the study was funded and the role of the funder in the identification, design, conduct, and reporting of the analysis. Describe other non-monetary sources of support.                                                                                        | 17             |
| Conflicts of interest                                                | 24  | Describe any potential for conflict of interest of study contributors in accordance with journal policy. In the absence of a journal policy, we recommend authors comply with International Committee of Medical Journal Editors recommendations.                          | 17             |

For consistency, the CHEERS Statement checklist format is based on the format of the CONSORT statement checklist

The **ISPOR CHEERS Task Force Report** provides examples and further discussion of the 24-item CHEERS Checklist and the CHEERS Statement. It may be accessed via the *Value in Health* link or via the ISPOR Health Economic Evaluation Publication Guidelines – CHEERS: Good Reporting Practices webpage: <http://www.ispor.org/TaskForces/EconomicPubGuidelines.asp>

The citation for the CHEERS Task Force Report is:  
 Husereau D, Drummond M, Petrou S, et al. Consolidated health economic evaluation reporting standards (CHEERS)—Explanation and elaboration: A report of the ISPOR health economic evaluations publication guidelines good reporting practices task force. *Value Health* 2013;16:231-50.

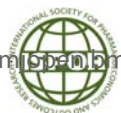

Supplement: bmjopen-2019-036625.draft_revisions.pdf [file bmjopen-2019-036625.draft_revisions.pdf]
