# Supplementary material for: Role of community health workers in improving cost efficiency in an active case finding tuberculosis programme: an operational research study from rural Bihar, India
Source: PubMed Central journal article supplement (PMC7536783; doi:10.1136/bmjopen-2019-036625), 2020-10-01
Supplement: bmjopen-2019-036625supp002.pdf [file bmjopen-2019-036625supp002.pdf]

## Supplementary File 2: The time allocation of human resource between case-finding and treatment support activities

Table A: Detailed time allocation for human resource

| #                                                                            | Human Resource                                                            | Activities                                         | Value                                                                                 | Comment                                                                                         |                                                                                                     |                                                  |
|------------------------------------------------------------------------------|---------------------------------------------------------------------------|----------------------------------------------------|---------------------------------------------------------------------------------------|-------------------------------------------------------------------------------------------------|-----------------------------------------------------------------------------------------------------|--------------------------------------------------|
| 1                                                                            | <b>Field coordinator (FC)</b>                                             | Work hours (in hours)                              | 48                                                                                    | 6 working days, 8 hours a day; 5 day field work + 1 day reporting-review-planning-training      |                                                                                                     |                                                  |
|                                                                              |                                                                           | Total patients diagnosed per month                 | 105                                                                                   | 100 - 110 patients diagnosed per month                                                          |                                                                                                     |                                                  |
|                                                                              |                                                                           | Average treatment duration per patient (in months) | 7                                                                                     | DSTB treatment duration of 6 - 8 months                                                         |                                                                                                     |                                                  |
|                                                                              |                                                                           | Patients per field coordinator, steady state       | 35                                                                                    | 18 field coordinators in the program                                                            |                                                                                                     |                                                  |
|                                                                              |                                                                           | Travel per week (in hours)                         | 193                                                                                   | 4 weeks in a month. Average travel reimbursement per field coordinator of ₹2700 at ₹3.5 per km. |                                                                                                     |                                                  |
|                                                                              |                                                                           | 1.1                                                | <b>Travel time per week (in hours)</b>                                                | 10                                                                                              | Average speed of 20 kmph                                                                            |                                                  |
|                                                                              |                                                                           | 1.2                                                | <b>Treatment support activities</b>                                                   | Time per visit (in hours)                                                                       | 1                                                                                                   | Half hour on average                             |
|                                                                              |                                                                           |                                                    |                                                                                       | Number of visits per patient in a month                                                         | 3                                                                                                   | 3 times a month                                  |
|                                                                              |                                                                           |                                                    |                                                                                       | Total time spent per week in treatment support activities (in hours)                            | 13                                                                                                  |                                                  |
|                                                                              |                                                                           | 1.3                                                | <b>Case-finding activities</b>                                                        | Time spent in ASHA (CHW) training per week (in hours)                                           | 2                                                                                                   | Average 1 meeting per week lasting nearly 2 hour |
| Time spent in meeting individual ASHAs per week (in hours)                   | 2                                                                         |                                                    |                                                                                       | 4 ASHAs per week, 0.5 hour per meeting                                                          |                                                                                                     |                                                  |
| Time spent in hospital visits and assisting in diagnosis per week (in hours) | 6                                                                         |                                                    |                                                                                       | 3 times a week, 2 hours per visit                                                               |                                                                                                     |                                                  |
| Time spent in meeting referrals and screening per week (in hours)            | 6                                                                         |                                                    |                                                                                       | 12 per week, 0.5 hour per visit                                                                 |                                                                                                     |                                                  |
| Total time spent per week in case-finding activities (in hours)              | 16                                                                        |                                                    |                                                                                       |                                                                                                 |                                                                                                     |                                                  |
| 1.4                                                                          | <b>Reporting-review-planning-training, time spent per week (in hours)</b> | 8                                                  | 1 day                                                                                 |                                                                                                 |                                                                                                     |                                                  |
| 2                                                                            | <b>Block coordinator (BC)</b>                                             | Work hours (in hours)                              | 48                                                                                    | 6 working days, 8 hours a day                                                                   |                                                                                                     |                                                  |
|                                                                              |                                                                           | 2.1                                                | Admin-reporting-review-planning, time spent per week (in hours)                       | 8                                                                                               | 1 complete day, focused around FCs in their area                                                    |                                                  |
|                                                                              |                                                                           | 2.2                                                | Block review-data management-project meeting-training, time spent per week (in hours) | 8                                                                                               | Project meeting once a week, data management with MIS team, reviewing project performance, training |                                                  |
|                                                                              |                                                                           | 2.3                                                | Supervisory work, time spent per week (in hours)                                      | 32                                                                                              | Split in proportion to FCs time spent in activities                                                 |                                                  |
| 3                                                                            | <b>Managers</b>                                                           | Work hours                                         | 48                                                                                    | 6 working days, 8 hours a day                                                                   |                                                                                                     |                                                  |
|                                                                              |                                                                           | 3.1                                                | Review-planning-design, time spent per week (in hours)                                | 24                                                                                              | 3 days a week, largely centered around case-finding                                                 |                                                  |
|                                                                              |                                                                           | 3.2                                                | Supervisory work, time spent per week (in hours)                                      | 24                                                                                              | Split in proportion to BCs time spent in activities                                                 |                                                  |
| 4                                                                            | <b>Data management team</b>                                               | Work hours                                         | 48                                                                                    | Split in proportion of FCs time under reporting-review-planning                                 |                                                                                                     |                                                  |

Table B: Summary of time allocation between case-finding and treatment support activities

| Field coordinator (FC) | Activity                     | Time | Travel | Reporting-review-planning-training | Total | Proportion |
|------------------------|------------------------------|------|--------|------------------------------------|-------|------------|
| 1                      | Case-finding activities      | 16.0 | 5.3    | 4.4                                | 25.7  | 55%        |
| 2                      | Treatment support activities | 13.1 | 4.3    | 3.6                                | 21.1  | 45%        |

Note: Time spent in travel and reporting-review-planning-training is proportionate to time spent in respective case-finding and treatment activities.

| Block coordinator (BC) | Activity                     | Admin-reporting-review-planning | Block review-data management-project meeting-training | Supervisory work, time spent per week | Proportion |
|------------------------|------------------------------|---------------------------------|-------------------------------------------------------|---------------------------------------|------------|
| 1                      | Case-finding activities      | 4.4                             | 8.0                                                   | 17.6                                  | 62%        |
| 2                      | Treatment support activities | 3.6                             | 0.0                                                   | 14.4                                  | 38%        |

| Managers | Activity                     | Review-planning-design | Supervisory work | Proportion |
|----------|------------------------------|------------------------|------------------|------------|
| 1        | Case-finding activities      | 24                     | 15.0             | 81%        |
| 2        | Treatment support activities | 0                      | 9.0              | 19%        |

| Data management team | Activity                     | Time | Proportion |
|----------------------|------------------------------|------|------------|
| 1                    | Case-finding activities      | 94.7 | 66%        |
| 2                    | Treatment support activities | 48.1 | 34%        |

Table C: Proportion of time allocation for human resource

| # | Human Resource         | Case-finding | Treatment support |
|---|------------------------|--------------|-------------------|
| 1 | Field coordinator (FC) | 55%          | 45%               |
| 2 | Block coordinator (BC) | 62%          | 38%               |
| 3 | Managers               | 81%          | 19%               |
| 4 | Data management team   | 66%          | 34%               |
