# Supplementary material for: Role of community health workers in improving cost efficiency in an active case finding tuberculosis programme: an operational research study from rural Bihar, India
Source: PubMed Central journal article supplement (PMC7536783; doi:10.1136/bmjopen-2019-036625), 2020-10-01
Supplement: bmjopen-2019-036625supp003.pdf [file bmjopen-2019-036625supp003.pdf]

## Supplementary File 3: Additional information on ASHA

Table A: Number of ASHAs

| # | Block      | Number of ASHA <sup>^</sup> | Population | ASHAs per 1000 pop. |
|---|------------|-----------------------------|------------|---------------------|
| 1 | Ujiarpur   | 264                         | 341906     | 0.77                |
| 2 | Saraianjan | 236                         | 287760     | 0.82                |
| 3 | Bibhutipur | 293                         | 391817     | 0.75                |
|   | Total      | 793                         | 1021483    | 0.78                |

Note: <sup>^</sup> Data as of December 2017.

Table B: Work of FC and ASHAs

| Indicator         | Steady state | Maximum |
|-------------------|--------------|---------|
| Total FC          | 18           | 23      |
| Pop. per FC       | 56749        | 44412   |
| ASHA per FC       | 44           | 34      |
| Intervention pop. | 1021483      |         |

Note:

1. FC is Field Coordinator
2. Steady state indicates matured program operations and maximum indicate their highest value during study period.

Table C1: ASHA's performance on reproductive, maternal, and child health program indicators in Samastipur, Bihar

| Indicator                                                           | Region | Baseline period |        |        |        | Implementation period |        |        |        | Quarterly average |                |
|---------------------------------------------------------------------|--------|-----------------|--------|--------|--------|-----------------------|--------|--------|--------|-------------------|----------------|
|                                                                     |        | 2016Q3          | 2016Q4 | 2017Q1 | 2017Q2 | 2017Q3                | 2017Q4 | 2018Q1 | 2018Q2 | Baseline          | Implementation |
| Total number of pregnant women registered for ANC                   | IR     | 5947            | 5137   | 6330   | 6229   | 6415                  | 5895   | 6593   | 6178   | 5911              | 6270           |
|                                                                     | CR     | 5951            | 5333   | 6340   | 6769   | 6387                  | 6083   | 6648   | 6190   | 6098              | 6327           |
| Number of Institutional Deliveries conducted (Including C-Sections) | IR     | 4592            | 4116   | 3913   | 3225   | 5011                  | 4419   | 3694   | 3134   | 3962              | 4065           |
|                                                                     | CR     | 4045            | 3646   | 3809   | 2739   | 4482                  | 4015   | 3487   | 2631   | 3560              | 3654           |
| Number of Immunisation sessions where ASHAs were present            | IR     | 2528            | 2531   | 2535   | 2606   | 2528                  | 2550   | 2574   | 2566   | 2550              | 2555           |
|                                                                     | CR     | 2743            | 2728   | 2719   | 2673   | 2583                  | 2626   | 2674   | 2672   | 2716              | 2639           |

Table C2: Detailed disaggregation of data in Table C1

| Indicator                                                           | Region | Baseline period |        |        |        | Implementation period |        |        |        | Block       |
|---------------------------------------------------------------------|--------|-----------------|--------|--------|--------|-----------------------|--------|--------|--------|-------------|
|                                                                     |        | 2016Q3          | 2016Q4 | 2017Q1 | 2017Q2 | 2017Q3                | 2017Q4 | 2018Q1 | 2018Q2 |             |
| Total number of pregnant women registered for ANC                   | IR     | 2312            | 1788   | 2376   | 2278   | 2323                  | 1832   | 2267   | 2296   | Bibhutipur  |
|                                                                     | IR     | 1562            | 1510   | 1858   | 1980   | 1959                  | 1899   | 2169   | 1993   | Sarairanjan |
|                                                                     | IR     | 2073            | 1839   | 2096   | 1971   | 2133                  | 2164   | 2157   | 1889   | Ujiarpur    |
|                                                                     | CR     | 2157            | 1837   | 2461   | 2413   | 2278                  | 2040   | 2477   | 2095   | Kalyanpur   |
|                                                                     | CR     | 802             | 659    | 904    | 792    | 929                   | 891    | 911    | 804    | Pusa        |
|                                                                     | CR     | 1433            | 1220   | 1341   | 1714   | 1645                  | 1761   | 1512   | 1552   | Singhia     |
| Number of Institutional Deliveries conducted (Including C-Sections) | CR     | 1559            | 1617   | 1634   | 1850   | 1535                  | 1391   | 1748   | 1739   | Warisnagar  |
|                                                                     | IR     | 1562            | 1501   | 1396   | 1125   | 1710                  | 1531   | 1354   | 1180   | Bibhutipur  |
|                                                                     | IR     | 1676            | 1458   | 1392   | 1157   | 1827                  | 1605   | 1326   | 1063   | Sarairanjan |
|                                                                     | IR     | 1354            | 1157   | 1125   | 943    | 1474                  | 1283   | 1014   | 891    | Ujiarpur    |
|                                                                     | CR     | 1059            | 931    | 1093   | 725    | 1160                  | 867    | 938    | 801    | Kalyanpur   |
|                                                                     | CR     | 816             | 675    | 661    | 546    | 833                   | 716    | 630    | 502    | Pusa        |
| Number of Immunisation sessions where ASHAs were present            | CR     | 995             | 995    | 1033   | 671    | 1186                  | 1264   | 986    | 639    | Singhia     |
|                                                                     | CR     | 1175            | 1045   | 1022   | 797    | 1303                  | 1168   | 933    | 689    | Warisnagar  |
|                                                                     | IR     | 923             | 909    | 915    | 933    | 931                   | 907    | 927    | 928    | Bibhutipur  |
|                                                                     | IR     | 736             | 765    | 763    | 800    | 768                   | 767    | 772    | 773    | Sarairanjan |
|                                                                     | IR     | 869             | 857    | 857    | 873    | 829                   | 876    | 875    | 865    | Ujiarpur    |
|                                                                     | CR     | 995             | 956    | 976    | 982    | 969                   | 964    | 980    | 971    | Kalyanpur   |
|                                                                     | CR     | 424             | 445    | 412    | 388    | 363                   | 363    | 373    | 378    | Pusa        |
|                                                                     | CR     | 606             | 622    | 628    | 631    | 588                   | 617    | 615    | 614    | Singhia     |
|                                                                     | CR     | 718             | 705    | 703    | 672    | 663                   | 682    | 706    | 709    | Warisnagar  |

## Note:

1. This is the dataset used for Table 3 in the manuscript.
2. Baseline period: Q3 of 2016 to Q2 of 2017
3. Study period: Q3 of 2017 to Q2 of 2018
4. IR: Intervention region
5. CR: Control region
6. ASHA: Accredited Social Health Activist
7. ANC: Antenatal checkup
