# Supplementary material for: Role of community health workers in improving cost efficiency in an active case finding tuberculosis programme: an operational research study from rural Bihar, India
Source: PubMed Central journal article supplement (PMC7536783; doi:10.1136/bmjopen-2019-036625), 2020-10-01
Supplement: bmjopen-2019-036625supp004.pdf [file bmjopen-2019-036625supp004.pdf]

## Supplementary File 4: The disaggregated yield of the active case-finding program from Q3 2017 to Q2 2018.

Table A: Summary of yield by various blocks

| #  | Indicator                                       | Total | Bibhutipur | Sarairanjan | Ujiarpur |
|----|-------------------------------------------------|-------|------------|-------------|----------|
| 1  | # of people eligible for screening (referrals)  | 12394 | 4702       | 3764        | 3928     |
| 2  | # of people screened                            | 11233 | 4175       | 3403        | 3655     |
| 3  | # of people with TB symptoms                    | 9895  | 3573       | 3066        | 3256     |
| 4  | # of people tested/evaluated for TB             | 5864  | 2062       | 1870        | 1932     |
| 5  | # of people diagnosed with TB                   | 1236  | 439        | 461         | 336      |
| 6  | # of people initiated on treatment              | 1194  | 427        | 437         | 330      |
| 7  | # of people diagnosed with TB (Bac+)            | 637   | 167        | 253         | 217      |
| 8  | Proportion of microbiologically diagnosed cases | 52%   | 38%        | 55%         | 65%      |
| 9  | Pre-diagnostic loss to follow-up                | 41%   | 42%        | 39%         | 41%      |
| 10 | Pre-treatment loss to follow-up                 | 3%    | 3%         | 5%          | 2%       |
| 11 | % screened of referred                          | 91%   | 89%        | 90%         | 93%      |
| 12 | % presumptive of screened                       | 88%   | 86%        | 90%         | 89%      |
| 13 | % tested of presumptive                         | 59%   | 58%        | 61%         | 59%      |
| 14 | % diagnosed with TB of tested                   | 21%   | 21%        | 25%         | 17%      |

Note: Bac+ means microbiologically-confirmed TB.

Table B: Details of yield by various blocks and quarters

| #  | Indicator                                       | Bibhutipur |       |       |       | Sarairanjan |       |       |      | Ujiarpur |       |       |       | Overall |      |      |      |
|----|-------------------------------------------------|------------|-------|-------|-------|-------------|-------|-------|------|----------|-------|-------|-------|---------|------|------|------|
|    |                                                 | B17Q3      | B17Q4 | B18Q1 | B18Q2 | S17Q3       | S17Q4 | S18Q1 | S8Q2 | U17Q3    | U17Q4 | U18Q1 | U18Q2 | 17Q3    | 17Q4 | 18Q1 | 18Q2 |
| 1  | # of people eligible for screening (referrals)  | 830        | 1320  | 1513  | 1039  | 794         | 781   | 988   | 1201 | 678      | 1080  | 1126  | 1044  | 2302    | 3181 | 3627 | 3284 |
| 2  | # of people screened                            | 698        | 1135  | 1420  | 922   | 648         | 737   | 933   | 1085 | 618      | 974   | 1078  | 985   | 1964    | 2846 | 3431 | 2992 |
| 3  | # of people with TB symptoms                    | 495        | 983   | 1273  | 822   | 593         | 662   | 870   | 941  | 502      | 894   | 983   | 877   | 1590    | 2539 | 3126 | 2640 |
| 4  | # of people tested/evaluated for TB             | 251        | 566   | 762   | 483   | 334         | 383   | 574   | 579  | 276      | 519   | 597   | 540   | 861     | 1468 | 1933 | 1602 |
| 5  | # of people diagnosed with TB                   | 83         | 102   | 136   | 118   | 121         | 114   | 114   | 112  | 80       | 86    | 74    | 96    | 284     | 302  | 324  | 326  |
| 6  | # of people initiated on treatment              | 83         | 100   | 132   | 112   | 117         | 111   | 109   | 100  | 79       | 85    | 73    | 93    | 279     | 296  | 314  | 305  |
| 7  | # of people diagnosed with TB (Bac+)            | 32         | 45    | 53    | 37    | 50          | 51    | 78    | 74   | 55       | 48    | 53    | 61    | 137     | 144  | 184  | 172  |
| 8  | Proportion of microbiologically diagnosed cases | 39%        | 44%   | 39%   | 31%   | 41%         | 45%   | 68%   | 66%  | 69%      | 56%   | 72%   | 64%   | 48%     | 48%  | 57%  | 53%  |
| 9  | Pre-diagnostic loss to follow-up                | 49%        | 42%   | 40%   | 41%   | 44%         | 42%   | 34%   | 38%  | 45%      | 42%   | 39%   | 38%   | 46%     | 42%  | 38%  | 39%  |
| 10 | Pre-treatment loss to follow-up                 | 0%         | 2%    | 3%    | 5%    | 3%          | 3%    | 4%    | 11%  | 1%       | 1%    | 1%    | 3%    | 2%      | 2%   | 3%   | 6%   |
| 11 | % screened of referred                          | 84%        | 86%   | 94%   | 89%   | 82%         | 94%   | 94%   | 90%  | 91%      | 90%   | 96%   | 94%   | 85%     | 89%  | 95%  | 91%  |
| 12 | % presumptive of screened                       | 71%        | 87%   | 90%   | 89%   | 92%         | 90%   | 93%   | 87%  | 81%      | 92%   | 91%   | 89%   | 81%     | 89%  | 91%  | 88%  |
| 13 | % tested of presumptive                         | 51%        | 58%   | 60%   | 59%   | 56%         | 58%   | 66%   | 62%  | 55%      | 58%   | 61%   | 62%   | 54%     | 58%  | 62%  | 61%  |
| 14 | % diagnosed with TB of tested                   | 33%        | 18%   | 18%   | 24%   | 36%         | 30%   | 20%   | 19%  | 29%      | 17%   | 12%   | 18%   | 33%     | 21%  | 17%  | 20%  |

Note:

1. B: Bibhutipur
2. S: Sarairanjan
3. U: Ujiarpur
